# Temperature independence of haemoglobin-oxygen affinity in smalleye Pacific opah (*Lampris incognitus*) and swordfish (*Xiphias gladius*)

Phillip R. Morrison<sup>1,\*†</sup>, Diego Bernal<sup>2</sup>, Chugey A. Sepulveda<sup>3</sup>, Nicholas C. Wegner<sup>4</sup>, and Colin J. Brauner<sup>1</sup>

<sup>1</sup>Department of Zoology, University of British Columbia, Vancouver, BC V6T 1Z4, Canada

<sup>2</sup>Department of Biology, University of Massachusetts, Dartmouth, MA 02747, USA

<sup>3</sup>Pfleger Institute of Environmental Research, Oceanside, CA 92054, USA

<sup>4</sup>Fisheries Resources Division, Southwest Fisheries Science Center, National Marine Fisheries Service, National Oceanic and Atmospheric Administration, La Jolla, CA 92037, USA

\*Present address: Biology Department and Department of Resource Management and Protection, Vancouver Island University, Nanaimo, BC V9R 5S5, Canada

†Author for correspondence: Phillip R. Morrison (phillip.r.morrison@gmail.com)

**KEY WORDS:** haemoglobin, blood, oxygen, temperature, regional heterothermy

## SUMMARY STATEMENT

Smalleye Pacific opah Hb-O<sub>2</sub> affinity is temperature-independent, while the temperature-dependence of swordfish Hb-O<sub>2</sub> affinity is pH dependent and becomes temperature independent at low pH.

## ABSTRACT

Smalleye Pacific opah and swordfish can conserve metabolic heat and maintain specific body regions warmer than ambient water temperature (i.e., regional heterothermy). Consequently, blood-O<sub>2</sub> uptake at the gills occurs at the environmental temperature at which the individual is found, but O<sub>2</sub> offloading will occur at different temperatures in different tissues. While several regionally heterothermic fishes (e.g., billfishes, tunas, and sharks) show a reduced temperature effect on haemoglobin (Hb)-O<sub>2</sub> affinity, the temperature-dependence of Hb-O<sub>2</sub> affinity in opah and swordfish is unknown. We hypothesized that the Hb of opah and swordfish would also show a reduced temperature-dependence. Opah whole blood-O<sub>2</sub> affinity exhibited a reverse temperature-dependence above 50% Hb-O<sub>2</sub> saturation (10–20°C, pH 7.2–8.0), while the temperature-dependence of swordfish blood-O<sub>2</sub> affinity (10–25°C) was saturation and pH dependent, becoming temperature-independent below 50% Hb-O<sub>2</sub> saturation and pH 7.4. Experiments on stripped haemolysates showed that adding ATP ([ATP]/[Hb]=30) decreased the temperature sensitivity of Hb-O<sub>2</sub> affinity, changing the overall oxygenation enthalpy ( $\Delta H^\circ$ ) values of opah (10–20°C) and swordfish (10–25°C) Hbs at pH 7.4 from -15 and -42 kJ mol<sup>-1</sup> O<sub>2</sub>, respectively, to +84 and -9 kJ mol<sup>-1</sup> O<sub>2</sub>. Swordfish blood-O<sub>2</sub> affinity was high compared to other large, pelagic, marine teleosts, which may be due to unusually low ATP/Hb levels, but might also enable swordfish to forage in the potentially low-oxygenated water of the upper reaches of the oxygen minimum layer. The existence of Hbs with reduced temperature sensitivity in regionally heterothermic fishes may prevent marked changes in Hb-O<sub>2</sub> affinity between the cold and warm tissues.

## INTRODUCTION

The swordfish (*Xiphias gladius*) and the smalleye Pacific opah (*Lampris incognitus*) are both large, mesopelagic species that can conserve metabolic heat and maintain the temperatures of select tissues or organs warmer than the surrounding water (i.e., regional heterothermy). Opah can maintain the cranial region and entire body core, including the heart, warmer than ambient water, which is unique among fishes because the hearts of all other fishes remain near ambient temperatures (Runcie et al., 2009; Wegner et al., 2015). In swordfish, thermogenic extraocular muscles heat the eyes and brain (Carey, 1982b), and recent work shows that their red slow-twitch

swimming muscles can maintain some degree of temperature elevation relative to the environment (Carey, 1990; Carey and Gibson, 1987; Stoeckl et al., 2018; Stoeckl et al., 2020). Only a few other fishes are also capable of heating their eyes and brain [i.e., billfishes (family Istiophoridae), tunas (family Scombridae), lamnid sharks (family Lamnidae), and the butterfly mackerel (*Gasterochisma melampus*)] or the red swimming muscles [i.e., tunas, lamnids, and the common thresher shark (*Alopias vulpinus*)] warmer than ambient water (Bernal and Sepulveda, 2005; Block, 1986; Carey and Teal, 1966; Carey and Teal, 1969a; Carey and Teal, 1969b; Carey et al., 1985; Sepulveda et al., 2008). The ability to maintain tissue temperatures warm while residing in cold water provides regionally heterothermic fishes with certain physiological advantages over their ectothermic competitors and ectothermic prey, such as greater power output by the warm swimming muscles, and superior vision due to enhanced temporal resolution in the heated retinas (Altringham and Block, 1997; Fritsches et al., 2005; Stoeckl et al., 2020).

Regionally heterothermic fishes are able to conserve metabolic heat in select body regions via vascular specializations (*retia mirabilia*) that form countercurrent heat exchangers, enabling cold arterial blood flowing from the gills to be warmed by venous blood (except in the opah) that is returning to the gills (Bernal et al., 2001; Block, 1986; Carey, 1982a; Carey and Teal, 1966; Carey and Teal, 1969a; Carey et al., 1985; Fudge and Stevens, 1996; Patterson et al., 2011; Runcie et al., 2009; Wegner et al., 2015). This heat transfer diminishes convective heat loss, since the venous blood cools to near ambient temperature before reaching the gill lamellae, where blood and water reach thermal equilibrium (Brill et al., 1994; Stevens and Sutterlin, 1976). Opah and swordfish have heat exchanging *retia* in the orbital circulation (Carey, 1982b; Runcie et al., 2009), and warmed blood perfuses the opah's entire body, including the heart, due to a series of unique afferent-efferent arterial heat exchanging *retia* within the gill arches, each of which is relatively thick and insulated with fat (Wegner et al., 2015). The swordfish also has putative heat exchanging *retia* that supply blood to the medially located red muscle; however, little is known on the degree of control swordfish have over red muscle temperature fluctuation during extended exposure to cold environmental temperatures (Carey, 1990; Stoeckl et al., 2018). A consequence of efficient vascular heat exchange is that blood-O<sub>2</sub> uptake at the gills occurs at quite different temperatures to O<sub>2</sub> offloading in the tissues that are thermally isolated by a *rete*, and these internal temperature gradients are exacerbated when opah and swordfish dive into cold water below the thermocline (Carey, 1990; Wegner et al., 2015).

During daily sojourns between the warm upper mixed layer above the thermocline (e.g.,  $>20^{\circ}\text{C}$ ) and deeper colder waters below the thermocline (e.g.,  $<5^{\circ}\text{C}$ ), swordfish may experience large and rapid changes in water temperatures in addition to possibly low environmental oxygen levels near the oxygen minimum layer (Carey, 1990; Carey and Robinson, 1981; Dewar et al., 2011; Sepulveda et al., 2010). While below the thermocline, swordfish cranial temperatures are relatively constant and can be elevated as much as  $12^{\circ}\text{C}$  above ambient water temperature (Carey, 1990). Although opah occasionally swim into the warm upper mixed layer, they tend to remain in cooler water below the thermocline where cranial temperatures are relatively constant and elevated at least  $6^{\circ}\text{C}$  above the surrounding water, while body and heart temperature are elevated at least  $3$  to  $5^{\circ}\text{C}$  above the surrounding water (Wegner et al., 2015). Therefore, blood- $\text{O}_2$  uptake at the gills must occur over the range of environmental temperatures encountered by opah and swordfish, but the blood must also transport  $\text{O}_2$  over steep internal temperature gradients, and  $\text{O}_2$  offloading must occur from the lowest temperature (e.g., at the gills) to the highest body temperatures (e.g., at the ocular muscles). Moreover, as blood flows through a heat exchanging *rete*, it is subjected to what has been described as “closed-system” temperature changes since the blood  $PO_2$  and  $PCO_2$  can vary with temperature, but the content of blood gases remain essentially constant due to the size and thickness of *rete* vessels, diminishing diffusion of gases out of the blood (Brill and Bushnell, 1991; Cech et al., 1984; Stevens et al., 1974). The  $\text{O}_2$  affinity of the blood can, thus, be directly affected by closed-system temperature changes as well as by variable environmental and body temperatures.

The  $\text{O}_2$  affinity of most jawed vertebrate haemoglobins (Hb) typically decreases with increasing temperature. This is because the heat of  $\text{O}_2$  binding to the haeme groups ( $\Delta H^{\text{O}_2}$ ) is intrinsically exothermic, so the overall enthalpy of oxygenation ( $\Delta H'$ ) is usually also exothermic (i.e., numerically negative). However, temperature-independent Hb- $\text{O}_2$  affinity and even reverse temperature-dependence (i.e., increasing temperature increases Hb- $\text{O}_2$  affinity) have been reported in several species of ectothermic and regionally heterothermic fishes, including tuna, billfish, and lamnid sharks (Andersen et al., 1973; Barlow et al., 2017; Bernal et al., 2018; Brill and Bushnell, 1991; Brill and Bushnell, 2006; Carey and Gibson, 1977; Carey and Gibson, 1983; Cech et al., 1984; Clark et al., 2008; Clark et al., 2010; Graham, 1973; Larsen et al., 2003; Lilly et al., 2015; Lowe et al., 2000; Sharp, 1975; Weber et al., 2010). Among fishes, reductions and reversals in the temperature dependence of Hb- $\text{O}_2$  affinity appear to stem predominantly from

oxygenation linked dissociation of allosteric effectors, such as hydrogen ions (i.e., Bohr protons) and organic phosphates (e.g., adenosine triphosphate, ATP), which contribute endothermically to  $\Delta H'$ , reducing the overall effect of temperature on Hb-O<sub>2</sub> affinity (Carey and Gibson, 1977; Dickinson and Gibson, 1981; Ikeda-Saito et al., 1983; Larsen et al., 2003; Morris and Gibson, 1982). The main effector of tuna Hb is protons, whereas ATP is the primary effector of lamnid shark Hb, and in billfishes it is pH-dependent binding of ATP (Ikeda-Saito et al., 1983; Larsen et al., 2003; Weber et al., 2010). In previous experiments on swordfish Hb, increasing temperature considerably decreased Hb-O<sub>2</sub> affinity (i.e., a normal temperature-dependence), although it is not clear if those experiments were conducted on whole blood, erythrolysates, or stripped haemolysates (Andersen et al., 1973). Therefore, it is not known if swordfish Hb exhibits an ATP-induced temperature-independence in a manner like that of the closely related istiophorid billfishes. We are not aware of any O<sub>2</sub> equilibria studies on Hb or blood from any of the opah species.

Several hypotheses have been proposed for the functional significance of reduced and reverse temperature-dependent Hb-O<sub>2</sub> affinity in regionally heterothermic fishes. In most, the importance is attributed to either a decreased influence of temperature on blood-O<sub>2</sub> transport across large internal temperature gradients, or to the energetic savings of an increased  $\Delta H'$  since less energy would be required to bind and unload O<sub>2</sub> (Carey and Gibson, 1977; Clark et al., 2008; Giardina et al., 1989; Graham, 1973; Weber and Campbell, 2011; Weber et al., 2010). Information on the effect of temperature on Hb-O<sub>2</sub> affinity in understudied regionally heterothermic fishes, such as swordfish and opah, can further broaden our understanding of the potential functional significance of reduced and reverse temperature-dependent Hb-O<sub>2</sub> affinity in regionally heterothermic fishes. To that end, we investigated the effect of temperature on Hb-O<sub>2</sub> affinity in blood and haemolysates from the swordfish and the smalleye Pacific opah.

Since reductions in the temperature sensitivity of Hb have been reported in other regional heterotherms, including billfishes, we hypothesized that both swordfish and opah Hb would have a similar reduced temperature sensitivity. Furthermore, since swordfish and istiophorid billfishes are closely related and their specialized extraocular muscles and heat exchanging *retia* are very similar (Block, 1986; Block, 1991), we expected that swordfish Hb would exhibit an ATP-induced temperature independence like previously studied billfish Hbs. We assessed the

temperature sensitivity of whole blood from these species by constructing oxygen equilibrium curves (OECs) and quantifying  $P_{50}$  (the  $PO_2$  at 50% Hb- $O_2$  saturation) at different temperatures, as well as by measuring blood  $PO_2$  during closed-system temperature changes in an experimental system meant to mimic the temperature changes that the blood experiences in a heat exchanging *rete*. We also constructed OECs and determined  $P_{50}$  in stripped haemolysates buffered at different pH levels, and in the absence and presence of ATP. Experiments were also conducted on haemolysates of Atlantic bluefin tuna that were opportunistically sampled, which allowed us to evaluate the enthalpic contributions of oxygenation linked effector dissociation among the different lineages of regionally heterothermic teleosts. Collectively, this information gives insight into the evolution and functional significance of reduced and reverse temperature-dependent Hb- $O_2$  affinity among disparate lineages of regionally heterothermic teleosts.

## MATERIALS AND METHODS

All capture, handling, and experimental procedures followed guidelines approved by the University of Massachusetts (animal care protocol no. 13-06), the California Department of Fish and Wildlife (Scientific Collection permit nos. SC-2471, SC-12372), and the University of British Columbia (UBC) Animal Care Committee (animal care no. A11-0235 and A15-0266). All partial pressures and  $P_{50}$  values are reported in mmHg (1 mmHg = 0.133 kPa).

### *Blood collection*

Swordfish ( $n = 7$ ) were captured by deep-set buoy gear (Sepulveda et al., 2014), and opah ( $n = 4$ ) were captured by deep-set buoy gear or short set pelagic long-line in the coastal waters off Southern California (i.e., the Southern California Bight). Atlantic bluefin tuna ( $n = 2$ ) were captured by hook and line off Massachusetts (fork lengths are reported in Table 1). Blood was drawn by caudal puncture into heparinized syringes. Blood samples were kept on ice and shipped by courier to the Department of Zoology, at the University of British Columbia (UBC), Vancouver, Canada, where experiments on whole blood were conducted within 1 to 4 days after the blood was collected. Preliminary experiments with swordfish blood ( $n = 3$ ) that were kept under refrigeration (4°C) for up to six days post-collection showed no changes in Hb

concentration, haematocrit (Hct; the proportion of red blood cells in blood), plasma pH, and there was no evidence of red blood cell (RBC) lysis (Morrison, 2020). However, during this time period, RBC intracellular nucleoside triphosphate (NTP) levels likely changed from levels typical of freshly sampled blood, possibly causing Hb-O<sub>2</sub> affinity to increase over time. Although we were not able to construct OECs on freshly drawn blood (i.e., < 1 day post-collection), we found that whole blood  $P_{50}$  at 15°C and 3.8 mmHg CO<sub>2</sub> was relatively unchanged from four to eight days post-collection in two swordfish ( $P_{50}$  ranged between 24–30 mmHg), and blood  $P_{50}$  of a third swordfish was unchanged from five to eight days post-collection (23–24 mmHg). Moreover, in a previous study of chub mackerel (*Scomber japonicus*) blood-O<sub>2</sub> affinity, experiments were also conducted at the UBC Vancouver campus on blood collected from mackerel captured off Southern California, and it was concluded that mackerel blood was viable for up to six days when stored at 4°C (Clark et al., 2010).

### *Experimental protocol*

Immediately after blood samples arrived at UBC, Hb concentration and Hct were measured, and subsamples of blood were centrifuged to separate the plasma from the RBCs for measurement of plasma osmolality. The packed RBCs and remaining plasma were frozen at -80°C for determination of RBC intracellular ATP concentration and plasma lactate concentration. Whole blood OECs were constructed by quantifying the relative Hb-O<sub>2</sub> saturation at a range of equilibration  $PO_2$ 's at two carbon dioxide (CO<sub>2</sub>) levels (1.9 mmHg and 7.6 mmHg), and at 10°C and 25°C for swordfish, and 10°C, 15°C, and 20°C for opah. Blood pH, and  $PO_2$  were measured in subsamples of blood equilibrated with gas mixes at each of the OEC temperature treatments. After completing the whole blood experiments, RBCs were separated from blood plasma by centrifugation. The RBCs were then thrice rinsed in ice cold marine teleost saline (Hoar and Hickman, 1983) and frozen at -80°C for experiments on stripped haemolysates. OECs were constructed for stripped haemolysates in the presence and absence of effector ions at 10°C and 25°C for swordfish, 10°C and 20°C for opah, and 15°C and 25°C for bluefin tuna.



### *Haematological parameters*

Haemoglobin concentration, expressed as tetrameric Hb ( $[\text{Hb}_4]$ , in  $\text{mmol l}^{-1}$ ), was measured by the cyanmethaemoglobin method using Drabkin's reagent and a haem-based extinction coefficient of  $11 \text{ mmol}^{-1} \text{ cm}^{-1}$  at a wavelength of 540 nm (Völkel and Berenbrink, 2000). Hct was measured as the percentage of packed RBCs relative to total blood volume after centrifuging samples in glass microcapillary tubes at approximately 13,000 RCF for five minutes. Mean corpuscular haemoglobin concentration (MCHC, in  $\text{mmol l}^{-1}$ ) was calculated by dividing  $[\text{Hb}]$  by Hct. Plasma osmolality ( $\text{mOsm kg}^{-1}$ ) was measured in  $10 \mu\text{L}$  of undiluted plasma with a vapour pressure osmometer (VAPRO 5520, Wescor, Logan, Utah). ATP was assayed with an ATP colourimetric assay kit (SIGMA-ALDRICH MAK190, Sigma-Aldrich Co. LLC, St. Louis, Missouri), and plasma lactate was measured spectrophotometrically using the LDH-catalyzed reaction converting lactate to pyruvate, where the reduction of  $\text{NAD}^+$  to NADH was measured at 340 nm (Bergmeyer et al., 1983).

### *Whole blood oxygen equilibria, pH, and $\text{PO}_2$*

Oxygen equilibria experiments were conducted at  $10^\circ\text{C}$  and  $25^\circ\text{C}$  for swordfish, and  $10^\circ\text{C}$ ,  $15^\circ\text{C}$ , and  $20^\circ\text{C}$  for opah. The coldest experimental temperature was  $10^\circ\text{C}$  for both species as this is close to the coldest water temperature regularly encountered by both swordfish and opah (Sepulveda et al., 2010; Wegner et al., 2015). The warmer experimental temperatures were chosen because  $25^\circ\text{C}$  is near to the warmest cranial and water temperatures for swordfish, and  $15^\circ\text{C}$  and  $20^\circ\text{C}$  are near the warmest body and cranial/water temperatures, respectively, for opah (Carey, 1990; Sepulveda et al., 2010; Wegner et al., 2015). At each temperature treatment, experiments were conducted at two physiologically relevant  $\text{CO}_2$  levels, low (1.9 mmHg) and high (7.6 mmHg), to quantify the Bohr coefficient (i.e.,  $\frac{\Delta P_{50}}{\Delta \text{pH}}$ ).

The relationship between Hb- $\text{O}_2$  saturation and  $\text{PO}_2$  (i.e., an OEC) was assessed on two to three replicate samples using a custom microplate-based, parallel assay, multi-cuvette tonometry cell as described by Lilly et al. (2013). Cuvettes were formed by sandwiching blood samples ( $\sim 3 \mu\text{L}$ ) between two sheets of low-density polyethylene (Glad® ClingWrap) that were secured on an aluminum ring with two plastic O-rings, which were then placed in a gas tight



tonometry cell designed to fit into a SpectraMax 190 microplate reader (Molecular Devices, Sunnyvale, USA). Optical density (OD) was measured every 20 to 30 seconds at 390nm (near an isosbestic point between oxygenated and deoxygenated Hb, where OD is independent of Hb-O<sub>2</sub> saturation), and at 430 nm and 436 nm (near the peak absorption for deoxygenated Hb), wavelengths commonly used in thin-film optical methods for measuring Hb-O<sub>2</sub> binding (e.g., Clark et al., 2008; Reeves, 1980; Weber et al., 2010). Initially, blood was equilibrated with pure N<sub>2</sub> for a minimum of 30 minutes until OD at 430 nm and 436 nm was stable, which was assumed to indicate full Hb deoxygenation. After deoxygenation, the Hb-O<sub>2</sub> saturation was increased with at least nine stepwise increments of the O<sub>2</sub> tension, balanced with N<sub>2</sub>, up to a *PO*<sub>2</sub> of 159.6 mmHg (i.e., approximate atmospheric *PO*<sub>2</sub> at sea level). In a tenth and final increment, the *PO*<sub>2</sub> was increased to 228 mmHg in the absence of CO<sub>2</sub> to achieve full Hb-O<sub>2</sub> saturation. OEC experiments lasted between one and two hours. In preliminary experiments, absorption spectra were recorded following the last oxygenation step (i.e., full Hb-O<sub>2</sub> saturation), and these spectra showed no evident peak at 630 nm, an absorption maximum for metHb (e.g., Völkel and Berenbrink, 2000). Moreover, the OD at 630 nm was not unusually high compared to an absorption maxima for oxygenated Hb ( $OD_{630\text{ nm}}/OD_{575\text{ nm}} < 0.04$ ), and  $\alpha/\beta$  peak OD ratios ( $OD_{575\text{ nm}}/OD_{540\text{ nm}}$ ) were around 1.06, which are both typical of oxygenated Hb with no significant metHb fraction (Völkel and Berenbrink, 2000; Weber et al., 2010; Zijlstra and Buursma, 1997). Therefore, in the remainder of the experiments, we did not consider metHb formation to have significantly affected our Hb-O<sub>2</sub> saturation measurements, and full Hb-O<sub>2</sub> saturation was assumed at the final oxygenation step. Gas mixtures of O<sub>2</sub>, CO<sub>2</sub>, and N<sub>2</sub> were obtained using a Wösthoff DIGAMIX® gas mixing pump (H. Wösthoff Messtechnik, Bochum, Germany). At each equilibration step, the difference in OD ( $\Delta OD$ ) between 390nm and 430nm or 436nm ( $\Delta OD = 430\text{ nm or }436\text{ nm} - 390\text{ nm}$ ) was used to calculate the fractional Hb-O<sub>2</sub> saturation ( $[Hb-O_2]/[Hb]$ ) from the change in  $\Delta OD$  from full deoxygenation, relative to that between full deoxygenation (pure N<sub>2</sub>) and full oxygenation (*PO*<sub>2</sub> of 228 mmHg and no CO<sub>2</sub>). OECs constructed using 430 nm were identical to those constructed using 436 nm.

Whole blood pH was measured in approximately 500  $\mu$ L of blood equilibrated for 1 h with either 1.9 mmHg or 7.6 mmHg CO<sub>2</sub> and a range O<sub>2</sub> tensions between 7.6 mmHg and 159.6 mmHg (balanced with N<sub>2</sub>), in rotating glass tonometers thermostated to either 10, 15, 20, or 25°C. The gas mixtures were humidified at the experimental temperature prior to entering the

tonometers. Blood was drawn into a gas tight syringe pre-flushed with the gas mixture, and pH was measured by drawing the blood through a Microelectrodes 16-705 flow-thru pH electrode in combination with a 16-702 flow-thru reference electrode (Microelectrodes Inc., Bedford, NH, USA) thermostated to the experimental temperature.

To mimic the closed-system temperature changes that blood may experience in the arterioles and venules of a heat exchanging *rete*, approximately 500  $\mu$ L blood samples equilibrated at either 10, 15, 20, or 25°C were injected into a Radiometer E5046  $PO_2$  electrode thermostated at the equilibration temperature as well as another  $PO_2$  electrode thermostated to a warmer or cooler experimental temperature according to Cech et al. (1984) and Brill and Bushnell (1991). Swordfish blood temperature was changed between 10°C and 25°C, whereas opah blood temperature was changed either between 10°C and 15°C or 15°C and 20°C. Although the blood was static within the electrode chamber, the blood was rapidly heated or cooled in a system where there is minimal exchange of gases and ions between the blood and another medium. Prior to injecting the blood, each  $PO_2$  electrode was flushed with the experimental gas mixture to minimise electrode response time to the respective  $PO_2$ . Temperature induced changes in  $PO_2$  were monitored using Acqknowledge® Data Acquisition Software (Version 3.7.3, BIOPAC Systems, Inc.) by viewing traces of  $PO_2$ , and when it appeared that the traces had stabilized, the respective values of each were recorded.

### *Haemolysates*

Frozen and packed RBCs were placed on ice and put in a refrigerator (4°C) where they thawed over 24 h. Thawed RBCs were then mixed with an equal volume of cold 0.1 mM Hepes buffer (pH 8.0) and centrifuged at 10,000 RCF to remove cell debris. The resulting erythrolysates were stripped of endogenous ionic effectors by passage through mixed bed ion exchange resin (Amberlite® MB-20). MetHb ( $Hb^+$ ) levels were assessed by oxygenating 10-20  $\mu$ L of the haemolysates in 1000  $\mu$ L of 100 mM Hepes buffer (pH 7.4) that was bubbled with 100%  $O_2$ , and a spectral scan was made from 500-700 nm (i.e., an oxyHb spectrum). If there was an evident peak or unusually high absorbance at 630 nm, an absorption maximum for metHb (Völkel and Berenbrink, 2000; Zijlstra and Buursma, 1997), then the  $Hb^+$  was reduced by adding a molar excess of sodium dithionite to the haemolysate, followed by passage through mixed bed

ion exchange resin. If spectral scans of reduced oxyHb showed  $\alpha/\beta$  peak OD ratios (OD575 nm/OD540 nm) around 1.06 (see above: Weber et al., 2010; Zijlstra and Buursma, 1997), and no evident peak at 630 nm relative to the OD at wavelengths either side of 630 nm (~ 600-660 nm), then the haemolysates were concentrated with centrifugal filters (30 kDa exclusion size limit) and used for OEC experiments. Oxygen equilibria were determined in 100 mM Hepes buffer (pH 6.9 to 7.8 and no  $\text{Cl}^-$ ) at a Hb concentration of 0.6 mM in the absence and presence of saturating levels of ATP (ratio of the concentration of ATP/Hb = 30). Although guanosine triphosphate (GTP), a potent allosteric effector of teleost Hbs, is also present in fish RBCs, ATP was used in these experiments since ATP concentrations are around six fold higher than GTP concentrations in billfish RBCs (Weber et al., 2010). ATP was added from a 500 mmol  $\text{l}^{-1}$  stock solution of ATP di-sodium salt (Sigma-Aldrich A7699) in water. OECs were generated at 10°C and 20°C for opah haemolysates, 10°C and 25°C for swordfish haemolysates, and 15°C and 25°C for bluefin tuna haemolysates following the procedures described above, except without  $\text{CO}_2$ , and the final  $\text{O}_2$  equilibration step (i.e., full saturation) was with 100%  $\text{O}_2$ . Experiments on bluefin tuna haemolysates were not conducted in the presence of ATP since others have reported that organic phosphates negligibly affect tuna Hb- $\text{O}_2$  affinity (Andersen et al., 1973; Ikeda-Saito et al., 1983). The pH of the haemolysate solutions was measured at the experimental temperature with a thermostated Mettler Toledo InLab Micro glass pH electrode (Mettler-Toledo LLC, Columbus, OH, USA).

### *Data analysis*

All statistical analyses and curve fitting were performed in R v 3.5.2 (R Core Team, 2022). For each blood or haemolysate paired data set of fractional Hb- $\text{O}_2$  saturation (response variable) and  $\text{PO}_2$  (explanatory variable), nonlinear regression was used to fit a three-parameter form of the Hill equation,

$$y = \frac{d}{1 + \left(\frac{a}{x}\right)^b}$$

where  $y$  is the fractional Hb- $\text{O}_2$  saturation,  $x$  is the  $\text{PO}_2$  (i.e., dosage),  $d$  is the maximum asymptote (i.e., the response value for infinite dosage),  $a$  is the point of inflection (i.e., where  $y =$

$d/2$ ),  $b$  is the slope of the steepest portion of the curve (i.e., the Hill coefficient,  $n_H$ ). The best-fit parameter values ( $a$ ,  $b$ , and  $d$ ) were used to calculate the  $PO_2$  values corresponding to specific Hb- $O_2$  saturations ( $P_S$ ; i.e.,  $P_{10}$ ,  $P_{20}$ ,  $P_{30}$ ,  $P_{40}$ ,  $P_{50}$ ,  $P_{60}$ ,  $P_{70}$ ,  $P_{80}$ ,  $P_{90}$ , and  $P_{95}$ ). Nonlinear least-squares curve fitting by the Levenberg-Marquardt algorithm was performed using the `nlsLM` function from the ‘`minpack.lm`’ package for R (Elzhov et al., 2010). Because teleost blood pH is typically dependent on Hb- $O_2$  saturation (Brauner et al., 1996; Jensen, 1986; Lowe et al., 1998), OEC parameters for each individual were used to calculate Hb- $O_2$  saturation at the equilibration  $O_2$  tensions, and the pH at a specific Hb- $O_2$  saturation ( $pH_S$ ) was then estimated from plots of %Hb- $O_2$  vs pH. The effects of pH and temperature on whole blood Hb- $O_2$  affinity were assessed with linear mixed models, where the response variable was  $\log_{10} P_S$  (e.g.,  $\log_{10} P_{50}$ ) and the explanatory variables were  $pH_S$  (continuous), assay temperature (as a factor), the interaction term between  $pH_S$  and assay temperature, and individual (id) as a random effect (R-language formula, ‘ $\log_{10}(P_S) \sim pH_S * temperature + (1|id)$ ’). Linear mixed models were fit using the `lmer` function from the ‘`lme4`’ package with the ‘`lmerTest`’ package (Bates et al., 2014; Kuznetsova et al., 2017). Mixed models were fit at each saturation from  $P_{10}$  to  $P_{95}$ , and for each model a Likelihood Ratio Test (LRT) of fixed effects, fit with maximum likelihood estimation using a Chi square distribution, was used to assess the relative importance of temperature in the model (i.e., to test the null hypothesis that temperature is a significant effector of Hb- $O_2$  affinity). The effects of  $pH_{50}$  and temperature on  $n_H$  values were also assessed with linear mixed models. For stripped haemolysate data, the effect of temperature on Hb- $O_2$  affinity ( $P_{50}$ ), and the pH dependency of  $P_{50}$  were analysed with linear models, where the response variable was  $\log_{10} P_{50}$  and the explanatory variables were pH (continuous), assay temperature (as a factor). Since the number of OECs generated from a stripped haemolysate differed among individuals, and pH was experimentally controlled, id was not included as a random effect and an interaction between temperature and pH was also not included in the model.

The mixed model fits (Bohr plots) were used to predict  $\log_{10} P_S$  values with bootstrap estimated standard errors (500 replications), and these were used to construct whole blood OECs at constant pH (pH 7.4, 7.5, 7.6, and 7.7) for each species temperature treatments. Predicted  $P_{50}$  values (i.e.,  $10^{\log_{10} P_{50}}$ ) were used as a proxy for whole blood- $O_2$  affinity. Haemolysate  $\log_{10} P_S$  values were calculated at specific pH values from linear models fit to data for each temperature and effector treatment. The temperature-dependence of whole blood and haemolysate  $O_2$

affinities were quantified by calculating  $\Delta H'$  values using the van't Hoff equation (Wyman, 1964):

$$\Delta H' = 2.303 \cdot R \cdot \frac{\Delta \log P_S}{\Delta \frac{1}{T}},$$

where  $R$  is the universal gas constant ( $0.008314 \text{ kJ K}^{-1} \text{ mol}^{-1}$ ) and  $T$  is the temperature in Kelvin. Whole blood  $\Delta H'$  calculations may not correctly quantify the heat of Hb-oxygenation since the contribution of other reactions to  $\Delta H'$  were not known for both the plasma and RBC intracellular compartments, and the RBC intracellular concentrations of allosteric effectors were not known nor controlled. Nevertheless, the temperature sensitivity of the blood from different species, both within and across studies, can be conveniently compared with whole blood  $\Delta H'$  values. Whole blood calculations are denoted as  $\Delta H'_{\text{WB}}$ , and for their calculation  $\log_{10} P_S$  values were determined at constant extracellular or plasma pH (pH 7.4, 7.5, 7.6, and 7.7), which is typically alkaline relative to RBC intracellular pH. The heat of solution of  $\text{O}_2$  [ $-14$  to  $-12 \text{ kJ mol}^{-1}$  between  $15$  and  $25^\circ\text{C}$  (Olofsson et al., 1984)] is included in both whole blood  $\Delta H'_{\text{WB}}$  and haemolysate  $\Delta H'$  values. The pH dependency of Hb- $\text{O}_2$  affinity was determined by calculating Bohr coefficients at different %Hb- $\text{O}_2$  saturations ( $P_S$ ):

$$\varphi = \frac{\Delta \log_{10} P_S}{\Delta \text{pH}}$$

where  $\varphi$  values are the slopes ( $\pm 95\%$  confidence intervals) from the fitted models of  $\log_{10} P_S$  vs pH values.

## RESULTS

### *Whole-blood experiments*

Blood parameters and species lengths are summarized in Table 1. Whole blood OEC's were successfully constructed for four opah and five swordfish, and the blood pH levels measured in the OEC experiments ranged from pH 7.23–8.04 for opah, and pH 7.33–7.94 for swordfish (Fig. 3). Whole blood  $P_{50}$  values at pH 7.7 [an approximation of arterial blood pH at  $25^\circ\text{C}$  from measurements reported from swimming yellowfin tuna (Korsmeyer et al., 1997)],  $n_H$  values, and Bohr coefficients are reported in Table 2. Measured whole blood OECs are shore

shown in Figs 1 and 2, the pH-dependence of blood-O<sub>2</sub> affinity ( $P_{50}$ ) is shown in Fig. 3, and modelled OECs at different temperatures and blood pH are presented in Fig. 4.

The aim of our analysis was to assess the effects of temperature and pH on  $P_S$ , the blood PO<sub>2</sub> corresponding to specific Hb-O<sub>2</sub> saturations (e.g.,  $P_{50}$ ). In opah blood, temperature was an important model factor for only the  $P_{90}$  regression ( $\chi^2 = 10.101$  df = 4,  $P = 0.039$ ), where a reverse temperature-dependence was evident in the corresponding Bohr plot (additional Bohr plots are available in the supplementary information, Fig. S1). At lower Hb-O<sub>2</sub> saturations, temperature did not significantly predict blood-O<sub>2</sub> affinity, which is evident by the overlapping data and regression lines presented in the Bohr plots (Fig. 3A). In swordfish blood, temperature was an important model factor from  $P_{50}$ – $P_{95}$  ( $\chi^2 = 7.284$ – $18.790$ , df = 2,  $P \leq 0.026$ ), where increasing temperature decreased blood-O<sub>2</sub> affinity (Fig. 4E–H). The effect of temperature on swordfish blood-O<sub>2</sub> affinity showed a pH-dependence, with temperature having a reduced effect on blood-O<sub>2</sub> affinity with declining pH (Fig. 4E–H), as is evident by the merging or crossing of the Bohr plot regression lines (Fig. 3C). The random intercept, id, accounted for 27–58% of the total variance for the swordfish regression models, and 28–80% of the total variance for the opah regression models.

OECs of both opah and swordfish blood exhibited considerable Bohr effects, evident as a right-shift (i.e., decreased blood-O<sub>2</sub> affinity) with declining pH (Fig. 4; additional modelled OECs are shown in Fig. S2). Opah blood pH was a significant predictor of  $\log P_S$  from 40–95% saturation (i.e.,  $P_{40}$ – $P_{95}$ ) at all temperatures ( $\beta \leq -0.38$ ,  $P \leq 0.025$ ). From 10–30% saturation (i.e.,  $P_{10}$ – $P_{30}$ ) blood pH was not a significant predictor of  $\log P_S$ , and an interaction between pH and temperature was not a significant predictor of  $\log P_S$  at any saturation. Swordfish blood pH was a significant predictor of  $\log P_S$  at all Hb-O<sub>2</sub> saturation levels and at both temperatures ( $\beta \leq -1.11$ ,  $P \leq 0.036$ ), but blood-O<sub>2</sub> affinity was more sensitive to pH changes at 10°C, as is evident by larger Bohr coefficients at 10°C than at 25°C (Table 2, and Fig. 3C). An interaction between pH and temperature was a significant predictor of  $\log P_S$  for swordfish  $\log P_{50}$ – $\log P_{90}$  ( $\beta \geq 0.74$ ,  $P \leq 0.049$ ).

Opah  $n_H$  values ranged from 1.49–3.00 at 10°C, from 1.51–2.97 at 15°C, and from 1.69–2.49 at 20°C (Fig. 3B), and swordfish  $n_H$  values ranged from 1.06–2.11 at 10°C, and from 0.93–1.46 at 25°C (Fig. 3D). Model predicted  $n_H$  values are presented in Table 2. Blood pH was not a

significant predictor of  $n_H$  for either species, temperature was also not an important predictor of opah  $n_H$  values, but temperature was an important predictor of swordfish  $n_H$  values ( $\beta = -0.44$ ,  $t_{(13.47)} = -4.21$ ,  $P = 0.0009$ ) with higher values at 10°C than at 25°C.

The effects of closed-system temperature changes on blood  $PO_2$  are shown in Fig. 5, with modelled temperature-induced changes in plasma  $PO_2$  predicted by Henry's law (i.e., increasing temperature will increase  $PO_2$  in a closed-system due to a reduction in plasma  $O_2$  solubility and vice versa) using  $O_2$  solubilities at different temperatures from Boutilier et al. (1984). Closed-system warming of opah blood generally decreased blood  $PO_2$ , presumably due to increased Hb- $O_2$  affinity with increasing temperature (i.e., a reverse temperature-dependence). Closed-system cooling of opah blood tended to increase blood  $PO_2$ , but this effect was more variable. In contrast, closed-system temperature changes of swordfish blood changed blood  $PO_2$  beyond the predicted temperature-induced change in plasma  $PO_2$ .

### *Haemolysate experiments*

Haemolysate experiments were conducted on samples from three opah, six swordfish, and the two bluefin tuna. Stripped haemolysate  $P_{50}$  values at pH 7.4 [an approximation of RBC intracellular pH (Weber et al., 2010)], Bohr coefficients, and  $\Delta H'$  values are summarized in Table 3. At 10°C, stripped haemolysate  $P_{50}$  of swordfish (1.8 mmHg) was lower than that of opah (5.9 mmHg), and at 25°C, swordfish  $P_{50}$  (4.5 mmHg) was lower than that of bluefin tuna (13.7 mmHg). The addition of ATP increased haemolysate  $P_{50}$  (i.e., decreased Hb- $O_2$  affinity) for both opah and swordfish (Fig. 7 and Table 3). The relationships between haemolysate pH and  $\log P_{50}$ , with associated  $n_H$  values, are presented in Fig. 7.

Opah stripped haemolysates in the absence of ATP showed a significant effect of pH on  $\log P_{50}$  ( $\beta = -0.527$ ,  $P = 0.005$ ), and  $P_{50}$  increased with increasing temperature ( $\Delta H' = -15 \text{ kJ mol}^{-1}$ ), but  $\log P_{50}$  values at pH 7.4 were not significantly different between 10 and 25°C (overlapping 95% CIs; Table 3) and temperature was not a significant predictor of  $\log P_{50}$  ( $\beta = 0.083$ ,  $P = 0.211$ ). In the presence of ATP, temperature was a significant predictor of  $\log P_{50}$  ( $\beta = -0.506$ ,  $P < 0.001$ ), but opah haemolysate  $P_{50}$  exhibited a reverse temperature-dependence ( $\Delta H' = +84 \text{ kJ mol}^{-1}$ ) with significantly lower haemolysate  $P_{50}$  (pH 7.4) values at 25°C than at 10°C



(Table 3 and Fig. 7A). Opah Bohr coefficients were increased with the addition of ATP (Table 3). For opah stripped haemolysates, temperature and pH were not significant predictors of  $n_H$ , both in the absence and presence of ATP.

Swordfish stripped haemolysates in the absence of ATP showed no significant effect of pH on  $\log P_{50}$  ( $\beta = -0.381$ ,  $P = 0.700$ ), as indicated by Bohr coefficients that were not significantly different from zero (Table 3). However, temperature was a significant predictor of  $\log P_{50}$  ( $\beta = 0.389$ ,  $P < 0.001$ ) with haemolysate  $P_{50}$  increasing with increasing temperature ( $\Delta H' = -42 \text{ kJ mol}^{-1}$ ). In the presence of ATP, pH was a significant predictor of swordfish  $\log P_{50}$  ( $\beta = -1.180$ ,  $P < 0.001$ ), but temperature was not ( $\beta = 0.073$ ,  $P = 0.061$ ). The addition of ATP to swordfish stripped haemolysates significantly increased the Bohr coefficients at both 10 and 25°C (-1.32 at 10°C, and -1.06 at 25°C), and the effect of temperature on swordfish  $P_{50}$  was reduced ( $\Delta H' = -9 \text{ kJ mol}^{-1}$ ) compared to when ATP was absent ( $\Delta H' = -42 \text{ kJ mol}^{-1}$ ; Table 3). For swordfish stripped haemolysates, pH was not a significant predictor of  $n_H$ , but temperature was a significant predictor of  $n_H$ , both in absence ( $\beta = -0.804$ ,  $P = 0.012$ ) and presence of ATP ( $\beta = 0.339$ ,  $P < 0.001$ ).

For bluefin tuna stripped haemolysate (no ATP), pH was a significant predictor of  $\log P_{50}$  ( $\beta = -0.670$ ,  $P < 0.001$ ), as was temperature ( $\beta = -0.169$ ,  $P = 0.004$ ). However, tuna haemolysate  $P_{50}$  exhibited a reverse temperature-dependence ( $\Delta H' = +29 \text{ kJ mol}^{-1}$ ; Fig. 7E), with significantly lower  $P_{50}$  (pH 7.4) values at 25°C than at 15°C (Table 3). Temperature was not a significant predictor of tuna stripped haemolysate  $n_H$  values, and although pH did not influence  $n_H$  at 15°C, pH was a significant predictor of  $n_H$  at 25°C ( $\beta = 0.989$ ,  $P = 0.039$ ).

## DISCUSSION

The purpose of this study was to investigate the temperature-dependence of Hb-O<sub>2</sub> affinity in two regionally heterothermic teleosts, the smalleye Pacific opah and the swordfish. Since reductions in the temperature sensitivity of Hb seems to be associated with regional heterothermy in vertebrates (e.g., Weber and Campbell, 2011), and reduced and reverse temperature effects have been reported from regionally heterothermic fishes, including istiophorid billfishes, we expected both swordfish and opah Hb to have a similar reduced

temperature sensitivity. The results show temperature-independent and reverse temperature-dependence of Hb-O<sub>2</sub> affinity in blood and stripped haemolysates of opah, and a pH and saturation dependent effect of temperature on Hb-O<sub>2</sub> affinity in blood and stripped haemolysates of swordfish (Figs 3, 4, 6, and 7).

Opah and swordfish both have elevated Hb concentrations, suggesting high blood-O<sub>2</sub> carrying capacities when compared to other less active teleosts (Bernal et al., 2001; Brill and Bushnell, 2006; Gallagher and Farrell, 1998). The haematocrit values (mean  $\pm$  s.e.m.) for swordfish ( $46.3 \pm 4.7\%$ ), opah ( $59.1 \pm 2.5\%$ ), and the two bluefin tuna (54% and 58%) were higher than values reported from resting tuna (35-44%) (Brill and Bushnell, 1991; Brill and Bushnell, 2006; Lowe et al., 2000). These relatively high hematocrit values are, however, within the range of values reported for capture-stressed marlins (43–55%) and tunas (75–83%) (Dobson et al., 1986; Wells et al., 1986), and our opah haematocrit was similar to a published value ( $53.5 \pm 14.1\%$  s.d.) (Wegner et al., 2015). Capture-stress can cause high haematocrits in fish, usually due to adrenergic release of RBCs stored in the spleen (i.e., splenic contraction),  $\beta$ -adrenergic stimulated RBC swelling, or a combination of the two (e.g., Wells et al., 1986; Wendelaar Bonga, 1997). The Hb concentrations reported in this study ( $1.8\text{--}2.1\text{ mmol l}^{-1}$ ; Table 1) are within the range of values reported for resting tunas ( $1.9\text{--}2.3\text{ mmol l}^{-1}$ ), while MCHCs ( $3.7\text{--}4.4\text{ mmol l}^{-1}$ ; Table 1) are lower than those of resting tunas ( $5.1\text{--}5.7\text{ mmol l}^{-1}$ ) but are within the range of values reported for capture-stressed tunas and marlins ( $3.8\text{--}4.8\text{ mmol l}^{-1}$ ) (Brill and Bushnell, 1991; Brill and Bushnell, 2006; Lowe et al., 2000; Wells et al., 1986). Therefore, RBC swelling in response to capture-stress likely contributed to the high haematocrits that we measured (Wells et al., 1986).

In this study, blood was withdrawn from swordfish and opah shortly after capture at-sea, because it was unrealistic to sample resting and cannulated fish. Consequently, the fish probably experienced varying levels of respiratory and metabolic acidosis concomitant with burst swimming and capture-induced fatigue, which is indicated by relatively high plasma lactate and osmolality levels (Table 1) that are comparable to values reported for capture-stressed tunas and marlins (Dobson et al., 1986; Wells et al., 1986). Even so, we were able to model OECs over a range of pH levels that are comparable to published studies on marlins and tunas, because the blood pH levels that we achieved with the CO<sub>2</sub> exposures (pH 7.23–8.04 for opah, and pH 7.33–

7.94 for swordfish) overlapped with the range of pH levels reported in O<sub>2</sub> equilibria studies of blood from both capture-stressed marlins (25°C), and resting tunas (15–30°C) (Brill and Bushnell, 1991; Brill and Bushnell, 2006; Dobson et al., 1986; Lowe et al., 2000; Wells and Davie, 1985). However, the RBC ATP levels were low relative to the RBC Hb concentrations (Table 1), and although they are lower than ATP levels reported for most teleosts under non-stressed conditions, they are within the range of values reported for capture-stressed tunas and marlins (Filho et al., 1992; Wells and Davie, 1985; Wells et al., 1986). Given the findings of our haemolysate experiments and those of previous studies, the amount of ATP present in the RBCs will undoubtedly affect Hb-O<sub>2</sub> affinity and its temperature-dependence (e.g., Larsen et al., 2003; Nelson et al., 2019; Weber et al., 2010). Therefore, fresh blood from unstressed opah and swordfish may have higher ATP levels, potentially causing different temperature-dependencies and lower O<sub>2</sub> binding affinities than we measured (i.e., higher  $P_{50}$  values than reported here). The effects of temperature that we observed in our experiments on whole blood were qualitatively like those for our experiments on stripped haemolysates, in that swordfish Hb showed a reduced temperature-dependence that was dependent on pH in both blood and stripped haemolysates (in the presence of ATP), and the reduced and reverse temperature-dependencies evident in opah blood were also observed in stripped haemolysates either in the absence of ATP (reduced temperature-dependence) or in the presence of ATP (reverse temperature-dependence) (Figs 3 and 7).

#### *Temperature-dependence of Hb-O<sub>2</sub> affinity*

Opah whole blood-O<sub>2</sub> affinity showed both reduced and reversed temperature-dependencies that were dependent on O<sub>2</sub> saturation, while the temperature-dependence of swordfish blood-O<sub>2</sub> affinity was dependent on both O<sub>2</sub> saturation and blood pH (Figs 4 and 6). Saturation and pH dependent effects of temperature on Hb-O<sub>2</sub> affinity have also been reported in studies of blood, stripped haemolysates, or isolated Hb components from some other regionally heterothermic fishes (Andersen et al., 1973; Carey and Gibson, 1977; Carey and Gibson, 1983; Ikeda-Saito et al., 1983; Sharp, 1975; Weber et al., 2010). In teleosts, the saturation dependence of the effect of temperature is largely due to the non-linear release of Bohr protons, with most proton dissociation occurring between 50 and 100% Hb-O<sub>2</sub> saturation (Brauner et al., 1996;

Ikeda-Saito et al., 1983; Lowe et al., 1998). Therefore, the results of this study exemplify the importance of evaluating how temperature influences the shape and position of the entire OEC, and that generalized conclusions can be misleading if only  $P_{50}$  values are evaluated (Sharp, 1975).

Among regionally heterothermic fishes, reductions in the thermal sensitivity of Hb-O<sub>2</sub> affinity have been attributed to oxygenation-linked effector dissociation that contribute endothermically to  $\Delta H'$  (e.g., Ikeda-Saito et al., 1983; Larsen et al., 2003; Weber and Campbell, 2011; Weber et al., 2010). In stripped haemolysate from three species of istiophorid billfishes, oxygenation-linked dissociation of ATP with secondary contributions from additional Bohr proton dissociation greatly reduced or reversed the temperature dependence of Hb-O<sub>2</sub> affinity (Weber et al., 2010). We observed similar effects of ATP and Bohr protons on the temperature-dependence of Hb-O<sub>2</sub> affinity in stripped haemolysates of swordfish, where the addition of ATP induced a Bohr effect and increased  $\Delta H'$  (pH 7.4) to -9 from -42 kJ mol O<sub>2</sub><sup>-1</sup> in the absence of ATP (Fig. 7C and Table 3). In opah stripped haemolysates in the absence of ATP, temperature had a relatively reduced effect on Hb-O<sub>2</sub> affinity with a  $\Delta H'$  of -15 kJ mol O<sub>2</sub><sup>-1</sup> at pH 7.4, but the addition of ATP caused a reverse temperature-dependence, increasing  $\Delta H'$  to +84 kJ mol O<sub>2</sub><sup>-1</sup> (Fig. 7A and Table 3). In the absence of ATP, opah stripped haemolysate-O<sub>2</sub> affinity may decrease with increasing temperature at high pH (extrapolated from regression lines in Fig. 7A), indicating that Bohr proton dissociation potentially contributes to the low  $\Delta H'$ , although other processes such as Hb conformational changes (i.e., T → R state transitions) may also have significant enthalpic contributions. We observed reverse temperature-dependent Hb-O<sub>2</sub> affinity in haemolysates (no ATP) of Atlantic bluefin tuna (Fig. 7E and Table 3). This finding is similar to previous work on bluefin tuna Hb showing that proton dissociation from many Bohr groups, concomitant with cooperative O<sub>2</sub> binding, underlies the reversed effect of temperature on Hb-O<sub>2</sub> affinity (Carey and Gibson, 1977; Ikeda-Saito et al., 1983; Morris and Gibson, 1982).

#### *Closed-system temperature changes*

The results of the effect of temperature on whole blood-O<sub>2</sub> affinity were paralleled during closed-system temperature changes. Opah whole blood-O<sub>2</sub> affinity showed evidence of a reverse temperature-dependence during the closed-system experiments, in which warming tended to

cause a reduction in blood  $PO_2$  and cooling tended to increase blood  $PO_2$  (Fig. 5A). In contrast, closed-system warming and cooling of swordfish blood caused blood  $PO_2$  to increase and decrease, respectively (Fig. 5B). The changes to swordfish blood  $PO_2$  were greater than predicted from the temperature dependence of the  $O_2$  solubility of blood plasma, which indicates that closed system warming probably caused Hb- $O_2$  offloading due to decreased Hb- $O_2$  affinity, and *vice versa*, cooling probably caused Hb- $O_2$  binding due to an increased Hb- $O_2$  affinity.

Early experiments on closed-system temperature changes on blood  $PO_2$  from regionally heterothermic fishes tested the hypothesis that temperature-independent Hb- $O_2$  affinity prevents premature Hb- $O_2$  offloading during closed-system warming in a heat exchanging *rete* and the surrounding muscle (Carey and Gibson, 1977; Cech et al., 1984; Graham, 1973). It was thought that if temperature induced Hb- $O_2$  offloading occurred as the blood was warmed in an artery or arteriole, then  $O_2$  may be lost from the arterial blood, potentially by arterio-venous  $O_2$  diffusion in a heat exchanging *rete*, which could reduce arterial blood- $O_2$  levels prior to perfusing the muscle capillaries (Carey and Gibson, 1977; Carey and Gibson, 1983; Graham, 1973). In addition to our results for opah, temperature-independent and reverse temperature-dependent blood- $O_2$  affinity during closed-system warming has been reported for several species of tuna and regionally heterothermic sharks (Bernal et al., 2018; Brill and Bushnell, 1991; Brill and Bushnell, 2006; Cech et al., 1984; P. Morrison, D. Bernal, C. Sepulveda, C. Brauner, unpublished data). However, if warming of arterial blood in a heat exchanging *rete* causes premature Hb- $O_2$  offloading that is detrimental to circulatory  $O_2$  delivery, then it would be expected that temperature-independent blood- $O_2$  affinity would be evident during closed-system temperature changes for all regionally heterothermic fishes. This is not the case since closed system warming greatly increased the  $PO_2$  of swordfish blood (Fig. 5B), and similar results have been reported for bigeye tuna (*Thunnus obesus*) and kawakawa (*Euthynnus affinis*) (Jones et al., 1986; Lowe et al., 2000). It seems unlikely that  $O_2$  would be lost from the arterial vessels upstream of the capillaries, especially since the arterioles and venules of vertebrate heat exchanging *retia*, as well as the diffusion distance between them, are about an order of magnitude greater than the vessels of a *rete* specialized for gas exchange, the swim bladder *rete* (Carey et al., 1985; Clark et al., 2008; Graham and Dickson, 2001; Lemons et al., 1987; Stevens et al., 1974). Since the anatomy of heat exchanging *retia* likely precludes significant arterio-venous  $O_2$  diffusion, reduced and reverse temperature dependent Hb- $O_2$  affinity is probably not

needed to prevent premature Hb-O<sub>2</sub> offloading. It is probably more important that Hb-O<sub>2</sub> affinity is not too different in the capillaries of warm and cold tissues.

*The functional significance of reduced and reversed temperature-dependence of Hb-O<sub>2</sub> affinity*

In most animals, endothermic Hb-O<sub>2</sub> offloading in the tissues and exothermic Hb-O<sub>2</sub> binding at the gas-exchange surface causes the outward transport and loss of metabolic heat to the environment, which contributes to ectothermy in fishes (Jensen et al., 1998; Stevens and Sutterlin, 1976; Weber and Fago, 2004). However, in the opah, most tunas, and regionally heterothermic sharks,  $\Delta H'_{WB}$  values are near zero or positive (i.e., temperature-independent and reverse-temperature dependent Hb-O<sub>2</sub> affinity), potentially eliminating any outward heat transport linked to Hb-O<sub>2</sub> offloading and binding at the tissues and gills, respectively, which could potentially save up to 13% of the heat produced during glucose metabolism, assuming an intrinsic enthalpy of heme oxygenation of -62 kJ mol<sup>-1</sup> and an oxycaloric equivalent for glucose metabolism of 473 kJ mol<sup>-1</sup> (Weber and Wells, 1989; Weber et al., 2010). This may increase the efficiency of heat retention in the warm red muscles of the opah and species that inhabit cold temperate or polar waters (e.g., some tunas and lamnid sharks). However, it is not clear if Hb-oxygenation enthalpy significantly contributes to thermoconservation, since both swordfish and bigeye tuna  $\Delta H'_{WB}$  values are negative (i.e., exothermic), yet swordfish undertake prolonged (up to 12 h) foraging excursions below the thermocline, where they remain within cold water (6–12°C) while maintaining cranial and red muscle temperatures elevated up to 10°C or more above the surrounding water (Carey, 1990; Lowe et al., 2000; Sepulveda et al., 2010; D. Bernal and C. A. Sepulveda, unpublished data).

Reduced and reverse temperature-dependent Hb-O<sub>2</sub> affinity should prevent excessive temperature induced shifts to the physiological OEC (i.e., *in vivo* Hb-O<sub>2</sub> affinity), and thus blood PO<sub>2</sub>, as peripheral tissue temperature changes with environmental temperature, and as blood flows from the gills to warmer tissues. In other words, Hb-O<sub>2</sub> affinity would not be greatly affected by temperature changes in the body or environment of a regionally heterothermic fish such as the opah. A rightward shifted OEC at colder temperature should ensure that Hb-O<sub>2</sub> affinity is not high enough to impair Hb-O<sub>2</sub> offloading to the cold peripheral tissues, or possibly even enhance O<sub>2</sub> offloading compared to Hb with a “normal” temperature-dependence (Clark et

al., 2008; Giardina et al., 1989; Weber and Campbell, 2011). If the physiological OEC is not too different in the capillaries of the warm and cold tissues, then metabolically produced CO<sub>2</sub> and protons will predominantly promote Hb-O<sub>2</sub> offloading and maintain matching between O<sub>2</sub> supply and O<sub>2</sub> demand to all the tissues and organs even though they vary in temperature.

Swordfish Hb, however, has a “normal” temperature-dependence at high O<sub>2</sub> saturations and high blood pH, but at low pH, Hb-O<sub>2</sub> affinity becomes temperature-independent. The possible benefits of temperature-independent Hb-O<sub>2</sub> affinity in billfishes have been generally attributed to a relatively left-shifted OEC at high temperature, potentially preventing large decreases to Hb-O<sub>2</sub> affinity as the blood is rapidly warmed (Weber et al., 2010). However, rather than preventing a right-shifted OEC in warm tissues (i.e., decreased Hb-O<sub>2</sub> affinity), the pH dependency of the effect of temperature on swordfish and billfish Hb may ensure a right-shifted OEC (i.e., decreased Hb-O<sub>2</sub> affinity), in cold tissues, which combined with a larger Bohr coefficient at low temperature (Table 2), may promote Hb-O<sub>2</sub> offloading in the capillaries of cold tissues and organs with a high metabolic demand (Clark et al., 2008). This may have the greatest physiological relevance to swordfish, in which organs such as the heart operate at cold ambient water temperatures (6-12°C) during foraging excursions below the thermocline, but the cardiac and swimming muscles of swordfish exhibit relatively greater tolerance to functioning in cold water, potentially elevating the O<sub>2</sub> demand of those muscles compared to those of other teleosts at cold temperatures (Galli et al., 2009; Stoehr et al., 2018; Stoehr et al., 2020).

Reductions in the thermal sensitivity of Hb may also be influenced by a species thermal behaviour since reduced temperature-dependent Hb-O<sub>2</sub> affinity is not a trait that is exclusive to regional heterotherms, and has been reported for several ectothermic elasmobranchs and teleosts (e.g., Barlow et al., 2017; Bernal et al., 2018; Cech et al., 1994; Clark et al., 2010; Hopkins and Cech, 1994; Weber et al., 1976). Temperature-independent Hb-O<sub>2</sub> affinity was originally proposed to potentially enable O<sub>2</sub> uptake as Atlantic bluefin tuna rapidly swim through waters of varying temperatures (Rossi Fanelli and Antonini, 1960). Ectothermic fishes could plausibly gain the same advantage from Hb with a reduced thermal sensitivity; however, it is not clear if temperature-independent Hb-O<sub>2</sub> affinity in ectothermic fishes is a consequence of effector binding that was selected for reasons unrelated to the temperature sensitivity of Hb.



### *Haemoglobin-O<sub>2</sub> affinity and low environmental oxygen*

Opah and swordfish whole blood  $P_{50}$  values at pH 7.7 and 10° were around 18 and 12 mmHg, respectively (Table 2), suggestive of relatively high blood-O<sub>2</sub> affinities in these species compared to other marine teleosts, including some tunas (e.g., Brill and Bushnell, 1991; Brill and Bushnell, 2006; Clark et al., 2008; Harter et al., 2022; Lowe et al., 2000). Low blood  $P_{50}$  values in this study were possibly linked to the low RBC ATP levels that may have been caused by capture-stress and the blood storage duration (1–4 days), although the stripped haemolysate experiments revealed high intrinsic Hb-O<sub>2</sub> affinities in both opah and swordfish (Table 3), with  $P_{50}$  values (pH 7.4) for swordfish (1.8 and 4.5 mmHg at 10 and 25°C, respectively) being higher than those of opah (5.9 and 7.3 mmHg at 10 and 20°C, respectively) and other istiophorid billfishes (3.5–4.0 mmHg at 10°C, and 10.5–14.8 mmHg at 25°C; Weber et al., 2010). Low swordfish  $P_{50}$  values were also reported by Andersen et al. (1973), around 4 and 12 mmHg at 5 and 25°C, respectively, although they did not report the pH and it is unclear if their experiments were conducted on blood or haemolysates. Furthermore, in two capture stressed istiophorid billfishes, blue marlin (*Makaira nigricans*) and striped marlin (*Kajikia audax*), blood  $P_{50}$  values at pH 7.6 and 25°C were around 13 and 16 mmHg, respectively, and the striped marlin ATP/Hb ratio was around 0.22, lower than the mean of the swordfish in this study (Dobson et al., 1986; Wells and Davie, 1985). Although a high blood-O<sub>2</sub> affinity in the swordfish may be due to the relatively low RBC ATP levels, we suspect that the high intrinsic Hb-O<sub>2</sub> affinity of the swordfish causes a high whole blood-O<sub>2</sub> affinity that might help swordfish to exploit relatively deep and potentially low oxygenated waters (Carey and Robinson, 1981; Dewar et al., 2011; Sepulveda et al., 2010).

Swordfish diurnal movements follow the vertical migrations of the organisms that form the deep scattering layer, thus exposing swordfish to depths (during the daytime) that are typically proximal to the upper reaches of the oxygen minimum layer (e.g., Sepulveda et al., 2010). Consequently, swordfish likely encounter low environmental oxygen levels during the day. In addition to a potentially high blood-O<sub>2</sub> affinity, swordfish also have a relatively large gill surface area that is comparable to tunas, but above that of istiophorid billfishes as well as most other marine teleosts (Wegner et al., 2010). A large gill surface area combined with a high

blood-O<sub>2</sub> affinity should enable adequate O<sub>2</sub> extraction from oxygen poor water and allow swordfish to exploit the upper reaches of the oxygen minimum layer during the day.

### *Summary*

The results presented here show temperature-independent and reversed temperature-dependent Hb-O<sub>2</sub> affinity in blood and haemolysates of opah, and temperature-independence at low pH in blood and haemolysates of swordfish. In regionally heterothermic fishes such as opah and swordfish, an increased  $\Delta H'$  might conserve heat-energy and possibly prevents Hb-O<sub>2</sub> affinity from being too different from the cold to the warm tissues and organs. The latter effect should promote O<sub>2</sub> unloading uniformly to all tissues despite differences in tissue temperature. Whole blood-O<sub>2</sub> affinities were relatively low for both opah and swordfish, which may have resulted from RBC ATP/Hb ratios that were relatively low for teleosts. RBC ATP/Hb ratios were, however, similar to those of capture-stressed tunas and marlins, and swordfish stripped haemolysates had high intrinsic O<sub>2</sub> affinities. A potentially high blood-O<sub>2</sub> affinity in the swordfish, may enable oxygen uptake from the water of the upper reaches of the oxygen minimum layer where swordfish tend to forage during daylight hours. Among regionally heterothermic teleosts, the relative contributions of the different effector ions that underlie the molecular mechanism of modulations to the enthalpy of Hb-O<sub>2</sub> binding differ among the opah, billfishes, and tunas, which all differ from lamnid sharks (Larsen et al., 2003; Weber and Campbell, 2011). It does not seem to be a coincidence that Hbs with reduced temperature sensitivity are present in all lineages of regionally heterothermic fishes investigated to date, yet this trait is shared with some ectothermic fishes (e.g., Clark et al., 2010; Nelson et al., 2019). Further studies on the temperature-dependence of Hb-O<sub>2</sub> affinity in regionally heterothermic fishes, including other opah and billfish species, and closely related ectothermic species are warranted to provide further insight into the evolution and functional significance of reduced and reverse temperature-dependent Hb-O<sub>2</sub> affinity.

## Acknowledgements

The authors thank Anne Kim for help with the OEC experiments, John Hyde for help with opah sample acquisition, and Jennifer Thirkell for logistical assistance. We also thank Dr. Richard Brill and Dr. Peter Bushnell for their assistance developing parts of this work.

## Competing interests

The authors declare no competing or financial interests.

## Funding

This work was supported by the National Science Foundation [1354593 to D.B., 1354772 to C. A. S.]. Funding for C.A.S was also provided by the NOAA Saltonstall Kennedy Program [NA17NMF4270216] as well as the California Ocean Protection Council, under Grant Agreement # C0303000, Project #R/OPCSFAQ-07 through the Sea Grant College Program. Funding was also provided by a National Sciences and Engineering Research Council (NSERC) Discovery grant to C.J.B. (261924-13; 2018-04172), and an NSERC Postgraduate Scholarship to P.R.M.

## REFERENCES

- Altringham, J. D. and Block, B. A.** (1997). Why do tuna maintain elevated slow muscle temperatures? Power output of muscle isolated from endothermic and ectothermic fish. *J. Exp. Biol.* **200**, 2617–2627.
- Andersen, M. E., Olson, J. S., Gibson, Q. H. and Carey, F. G.** (1973). Studies on ligand binding to hemoglobins from teleosts and elasmobranchs. *J. Biol. Chem.* **248**, 331–341.
- Barlow, S. L., Metcalfe, J., Righton, D. A. and Berenbrink, M.** (2017). Life on the edge: O<sub>2</sub> binding in Atlantic cod red blood cells near their southern distribution limit is not sensitive to temperature or haemoglobin genotype. *J. Exp. Biol.* **220**, 414–424.

- Bates, D., Mächler, M., Bolker, B. and Walker, S.** (2014). Fitting linear mixed-effects models using lme4.
- Bergmeyer, H. U., Bergmeyer, J. and Grassl, M.** (1983). *Methods of enzymatic analysis*. Weinheim; Deerfield Beach, Fla.: Verlag Chemie.
- Bernal, D. and Sepulveda, C. A.** (2005). Evidence for temperature elevation in the aerobic swimming musculature of the common thresher shark, *Alopias vulpinus*. *Copeia* **2005**, 146–151.
- Bernal, D., Dickson, K. A., Shadwick, R. E. and Graham, J. B.** (2001). Review: analysis of the evolutionary convergence for high performance swimming in lamnid sharks and tunas. *Comp. Biochem. Physiol. A. Mol. Integr. Physiol.* **129**, 695–726.
- Bernal, D., Reid, J. P., Roessig, J. M., Matsumoto, S., Sepulveda, C. A., Cech, J. J. and Graham, J. B.** (2018). Temperature effects on the blood oxygen affinity in sharks. *Fish Physiol. Biochem.* 1–19.
- Block, B. A.** (1986). Structure of the brain and eye heater tissue in marlins, sailfish, and spearfishes. *J. Morphol.* **190**, 169–189.
- Block, B. A.** (1991). Endothermy in fish: thermogenesis, ecology and evolution. In *Biochemistry and Molecular Biology of Fishes* (ed. Hochachka, P. W.) and Mommsen, T. P.), pp. 269–311. New York: Elsevier.
- Boutilier, R. G., Heming, T. A. and Iwama, G. K.** (1984). Appendix: Physicochemical parameters for use in fish respiratory physiology. In *Gills: Anatomy, Gas Transfer, and Acid-Base Regulation (Fish Physiology Series)*. Vol. 10A (ed. Hoar, W. S.) and Randall, D. J.), pp. 403–430. Orlando: Academic Press.
- Brauner, C. J., Gilmour, K. M. and Perry, S. F.** (1996). Effect of haemoglobin oxygenation on Bohr proton release and CO<sub>2</sub> excretion in the rainbow trout. *Respir. Physiol.* **106**, 65–70.
- Brill, R. W. and Bushnell, P. G.** (1991). Effects of open-and closed-system temperature changes on blood oxygen dissociation curves of skipjack tuna, *Katsuwonus pelamis*, and yellowfin tuna, *Thunnus albacares*. *Can. J. Zool.* **69**, 1814–1821.
- Brill, R. W. and Bushnell, P. G.** (2006). Effects of open- and closed-system temperature changes on blood O<sub>2</sub>-binding characteristics of Atlantic bluefin tuna (*Thunnus thynnus*). *Fish Physiol. Biochem.* **32**, 283–294.
- Brill, R. W., Dewar, H. and Graham, J. B.** (1994). Basic concepts relevant to heat transfer in fishes, and their use in measuring the physiological thermoregulatory abilities of tunas. *Environ. Biol. Fishes* **40**, 109–124.
- Carey, F. G.** (1982a). Warm fish. In *A Companion to Animal Physiology* (ed. Taylor, C. R., Johansen, K., and Bolis, L.), p. 18. Cambridge: Cambridge University Press.

- Carey, F. G. (1982b). A brain heater in the swordfish. *Science* **216**, 1327–1329.
- Carey, F. G. (1990). Further acoustic telemetry observations of swordfish. In *Planning the Future of Billfishes, Research and Management in the 90s and Beyond* (ed. Stroud, R. H.), pp. 103–122. Savannah, GA: National Coalition for Marine Conservation, Inc.
- Carey, F. G. and Gibson, Q. H. (1977). Reverse temperature dependence of tuna hemoglobin oxygenation. *Biochem. Biophys. Res. Commun.* **78**, 1376–1382.
- Carey, F. G. and Gibson, Q. H. (1983). Heat and oxygen exchange in the rete mirabile of the bluefin tuna, *Thunnus thynnus*. *Comp. Biochem. Physiol. A Physiol.* **74**, 333–342.
- Carey, F. G. and Gibson, Q. H. (1987). Blood flow in the muscle of free-swimming fish. *Physiol. Zool.* **60**, 138–148.
- Carey, F. G. and Robinson, B. H. (1981). Daily patterns in the activities of swordfish, *Xiphias gladius*, observed by acoustic telemetry. *Fish. Bull. - U. S. Natl. Mar. Fish. Serv.*
- Carey, F. G. and Teal, J. M. (1966). Heat conservation in tuna fish muscle. *Proc. Natl. Acad. Sci. U. S. A.* **56**, 1464–1469.
- Carey, F. G. and Teal, J. M. (1969a). Mako and porbeagle: warm-bodied sharks. *Comp. Biochem. Physiol.* **28**, 199–204.
- Carey, F. G. and Teal, J. M. (1969b). Regulation of body temperature by the bluefin tuna. *Comp. Biochem. Physiol.* **28**, 205–213.
- Carey, F. G., Casey, J. G., Pratt, H. L., Urquhart, D. and McCosker, J. E. (1985). Temperature, heat production and heat exchange in lamnid sharks. *South. Calif. Acad. Sci.* **9**, 92–108.
- Cech, J. J., Laurs, R. M. and Graham, J. B. (1984). Temperature-induced changes in blood gas equilibria in the albacore, *Thunnus alalunga*, a warm-bodied tuna. *J. Exp. Biol.* **109**, 21–34.
- Cech, J. J., Castleberry, D. T. and Hopkins, T. E. (1994). Temperature and CO<sub>2</sub> effects on blood O<sub>2</sub> equilibria in northern squawfish, *Ptychocheilus oregonensis*. *Can. J. Fish. Aquat. Sci.* **51**, 13–19.
- Clark, T. D., Seymour, R. S., Wells, R. M. G. and Frappell, P. B. (2008). Thermal effects on the blood respiratory properties of southern bluefin tuna, *Thunnus maccoyii*. *Comp. Biochem. Physiol. A. Mol. Integr. Physiol.* **150**, 239–246.
- Clark, T. D., Rummer, J. L., Sepulveda, C. A., Farrell, A. P. and Brauner, C. J. (2010). Reduced and reversed temperature dependence of blood oxygenation in an ectothermic scombrid fish: implications for the evolution of regional heterothermy? *J. Comp. Physiol. B* **180**, 73–82.

- Dewar, H., Prince, E. D., Musyl, M. K., Brill, R. W., Sepulveda, C., Luo, J., Foley, D., Orbesen, E. S., Domeier, M. L., Nasby-Lucas, N., et al.** (2011). Movements and behaviors of swordfish in the Atlantic and Pacific Oceans examined using pop-up satellite archival tags. *Fish. Oceanogr.* **20**, 219–241.
- Dickinson, F. M. and Gibson, Q. H.** (1981). Studies on carbon monoxide binding by shark haemoglobin. *Biochem J* **197**, 437–446.
- Dobson, G. P., Wood, S. C., Daxboeck, C. and Perry, S. F.** (1986). Intracellular buffering and oxygen transport in the Pacific blue marlin (*Makaira nigricans*): Adaptations to high-speed swimming. *Physiol. Zool.* **59**, 150–156.
- Elzhov, T. V., Mullen, K. M., Spiess, A. and Bolker, B.** (2010). R interface to the Levenberg-Marquardt nonlinear least-squares algorithm found in MINPACK. *Plus Support Bounds* 1–2.
- Filho, D. W., Marcon, J. L., Caprario, F. X. and Nollis, A. C.** (1992). Erythrocytic nucleoside triphosphates in marine fish. *Comp. Biochem. Physiol. A Physiol.* **102**, 323–331.
- Fritsches, K. A., Brill, R. W. and Warrant, E. J.** (2005). Warm eyes provide superior vision in swordfishes. *Curr. Biol.* **15**, 55–58.
- Fudge, D. S. and Stevens, E. D.** (1996). The visceral retia mirabilia of tuna and sharks: an annotated translation and discussion of the Eschricht & Müller 1835 paper and related papers. *Guelph Ichthyol. Rev.* **4**,.
- Gallaugh, P. and Farrell, A. P.** (1998). Hematocrit and blood oxygen-carrying capacity. In *Fish Respiration (Fish Physiology Series)*. Vol. 17 (ed. Perry, S. F.) and Tufts, B. L.), pp. 185–227. San Diego: Academic Press.
- Galli, G. L. J., Shiels, H. A. and Brill, R. W.** (2009). Temperature sensitivity of cardiac function in pelagic fishes with different vertical mobilities: yellowfin tuna (*Thunnus albacares*), bigeye tuna (*Thunnus obesus*), mahimahi (*Coryphaena hippurus*), and swordfish (*Xiphias gladius*). *Physiol. Biochem. Zool.* **82**, 280–290.
- Giardina, B., Condò, S. G., El Sherbini, S., Mathisen, S., Tyler, N., Nuutinen, M., Bårdgard, A. and Brix, O.** (1989). Arctic life adaptation—I. The function of reindeer hemoglobin. *Comp. Biochem. Physiol. Part B Comp. Biochem.* **94**, 129–133.
- Graham, J. B.** (1973). Heat exchange in the black skipjack, and the blood-gas relationship of warm-bodied fishes. *Proc. Natl. Acad. Sci.* **70**, 1964–1967.
- Graham, J. B. and Dickson, K. A.** (2001). Anatomical and physiological specializations for endothermy. In *Fish Physiology*, pp. 121–165. Academic Press.
- Harter, T. S., Damsgaard, C. and Regan, M. D.** (2022). Linking environmental salinity to respiratory phenotypes and metabolic rate in fishes: a data mining and modelling approach. *J. Exp. Biol.* **225**, jeb243421.



- Hoar, W. S. and Hickman, C. P.** (1983). *A laboratory companion for general and comparative physiology*. Englewood Cliffs, N.J.: Prentice-Hall.
- Hopkins, T. E. and Cech, J. J.** (1994). Temperature effects on blood- oxygen equilibria in relation to movements of the bat ray, *Myliobatis California* in Tomales Bay, California. *Mar. Behav. Physiol.* **24**, 227–235.
- Ikeda-Saito, M., Yonetani, T., Gibson, Q. H. and Gilbert, G. A.** (1983). Oxygen equilibrium studies on hemoglobin from the bluefin tuna (*Thunnus thynnus*). *J. Mol. Biol.* **168**, 673–686.
- Jensen, F. B.** (1986). Pronounced influence of Hb-O<sub>2</sub> saturation on red cell pH in tench blood in vivo and in vitro. *J. Exp. Zool.* **238**, 119–124.
- Jensen, F. B., Fago, A. and Weber, R. E.** (1998). Hemoglobin structure and function. In *Fish Respiration (Fish Physiology Series)*. Vol. 17 (ed. Perry, S. F.) and Tufts, B. L.), pp. 1–40. San Diego: Academic Press.
- Jones, D. R., Brill, R. W. and Mense, D. C.** (1986). The influence of blood gas properties on gas tensions and pH of ventral and dorsal aortic blood in free-swimming tuna, *Euthynnus affinis*. *J. Exp. Biol.* **120**, 201–213.
- Korsmeyer, K. E., Lai, N. C., Shadwick, R. E. and Graham, J. B.** (1997). Oxygen transport and cardiovascular responses to exercise in the yellowfin tuna *Thunnus albacares*. *J. Exp. Biol.* **200**, 1987–1997.
- Kuznetsova, A., Brockhoff, P. B. and Christensen, R. H. B.** (2017). lmerTest package: tests in linear mixed effects models. *J. Stat. Softw.* **82**,.
- Larsen, C., Malte, H. and Weber, R. E.** (2003). ATP-induced reverse temperature effect in isohemoglobins from the endothermic porbeagle shark (*Lamna nasus*). *J. Biol. Chem.* **278**, 30741–30747.
- Lemons, D. E., Chien, S., Crawshaw, L. I., Weinbaum, S. and Jiji, L. M.** (1987). Significance of vessel size and type in vascular heat transfer. *Am. J. Physiol.-Regul. Integr. Comp. Physiol.* **253**, R128–R135.
- Lilly, L. E., Blinbry, S. K., Viscardi, C. M., Perez, L., Bonaventura, J. and McMahon, T. J.** (2013). Parallel assay of oxygen equilibria of hemoglobin. *Anal. Biochem.* **441**, 63–68.
- Lilly, L. E., Bonaventura, J., Lipnick, M. S. and Block, B. A.** (2015). Effect of temperature acclimation on red blood cell oxygen affinity in Pacific bluefin tuna (*Thunnus orientalis*) and yellowfin tuna (*Thunnus albacares*). *Comp. Biochem. Physiol. A. Mol. Integr. Physiol.* **181**, 36–44.
- Lowe, T. E., Brill, R. W. and Cousins, K. L.** (1998). Responses of the red blood cells from two high-energy-demand teleosts, yellowfin tuna (*Thunnus albacares*) and skipjack tuna (*Katsuwonus pelamis*), to catecholamines. *J. Comp. Physiol. B* **168**, 405–418.



- Lowe, T. E., Brill, R. W. and Cousins, K. L.** (2000). Blood oxygen-binding characteristics of bigeye tuna (*Thunnus obesus*), a high-energy-demand teleost that is tolerant of low ambient oxygen. *Mar. Biol.* **136**, 1087–1098.
- Morris, R. J. and Gibson, Q. H.** (1982). Cooperative ligand binding to hemoglobin. Effects of temperature and pH on a hemoglobin with spectrophotometrically distinct chains (*Tunnus thynnus*). *J. Biol. Chem.* **257**, 4869–4874.
- Morrison, P. R.** (2020). On the temperature-dependence of haemoglobin-oxygenation and blood-oxygen transport in regionally heterothermic teleosts and sharks. *PhD thesis*, University of British Columbia, Vancouver, BC.
- Nelson, C., Barlow, S. L. and Berenbrink, M.** (2019). ATP-induced reversed thermal sensitivity of O<sub>2</sub> binding in both major haemoglobin polymorphs of the non-endothermic Atlantic cod, *Gadus morhua*. *J. Exp. Biol.* **222**,.
- Olofsson, G., Oshodj, A. A., Qvarnström, E. and Wadsö, I.** (1984). Calorimetric measurements on slightly soluble gases in water Enthalpies of solution of helium, neon, argon, krypton, xenon, methane, ethane, propane, n-butane, and oxygen at 288.15, 298.15, and 308.15 K. *J. Chem. Thermodyn.* **16**, 1041–1052.
- Patterson, J. C., Sepulveda, C. A. and Bernal, D.** (2011). The vascular morphology and in vivo muscle temperatures of thresher sharks (Alopiidae). *J. Morphol.* **272**, 1353–1364.
- R Core Team** (2022). R: A language and environment for statistical computing.
- Reeves, R. B.** (1980). A rapid micro method for obtaining oxygen equilibrium curves on whole blood. *Respir. Physiol.* **42**, 299–315.
- Rossi Fanelli, A. and Antonini, E.** (1960). Oxygen equilibrium of haemoglobin from *Thunnus thynnus*. *Nature* **186**, 895–896.
- Runcie, R. M., Dewar, H., Hawn, D. R., Frank, L. R. and Dickson, K. A.** (2009). Evidence for cranial endothermy in the opah (*Lampris guttatus*). *J. Exp. Biol.* **212**, 461–470.
- Sepulveda, C. A., Dickson, K. A., Bernal, D. and Graham, J. B.** (2008). Elevated red myotomal muscle temperatures in the most basal tuna species, *Allothunnus fallai*. *J. Fish Biol.* **73**, 241–249.
- Sepulveda, C. A., Knight, A., Nasby-Lucas, N. and Domeier, M. L.** (2010). Fine-scale movements of the swordfish *Xiphias gladius* in the Southern California Bight. *Fish. Oceanogr.* **19**, 279–289.
- Sepulveda, C. A., Aalbers, S. A. and Heberer, C.** (2014). Testing modified deep-set buoy gear to minimize bycatch and increase swordfish selectivity. *BREP* **1**, 27–32.
- Sharp, G. D.** (1975). A comparison of the O<sub>2</sub> dissociation properties of some scombrid hemoglobins. *Comp. Biochem. Physiol. A* **51**, 683–691.

- Stevens, E. D. and Sutterlin, A. M.** (1976). Heat transfer between fish and ambient water. *J. Exp. Biol.* **65**, 131–145.
- Stevens, E. D., Lam, H. M. and Kendall, J.** (1974). Vascular anatomy of the counter-current heat exchanger of skipjack tuna. *J. Exp. Biol.* **61**, 145.
- Stoehr, A., St. Martin, J., Aalbers, S., Sepulveda, C. and Bernal, D.** (2018). Free-swimming swordfish, *Xiphias gladius*, alter the rate of whole body heat transfer: morphological and physiological specializations for thermoregulation. *ICES J. Mar. Sci.* **75**, 858–870.
- Stoehr, A. A., Donley, J. M., Aalbers, S. A., Syme, D. A., Sepulveda, C. and Bernal, D.** (2020). Thermal effects on red muscle contractile performance in deep-diving, large-bodied fishes. *Fish Physiol. Biochem.* **46**, 1833–1845.
- Völkel, S. and Berenbrink, M.** (2000). Sulphaemoglobin formation in fish: a comparison between the haemoglobin of the sulphide-sensitive rainbow trout (*Oncorhynchus Mykiss*) and of the sulphide-tolerant common carp (*Cyprinus Carpio*). *J. Exp. Biol.* **203**, 1047–1058.
- Weber, R. E. and Campbell, K. L.** (2011). Temperature dependence of haemoglobin-oxygen affinity in heterothermic vertebrates: mechanisms and biological significance. *Acta Physiol.* **202**, 549–562.
- Weber, R. E. and Fago, A.** (2004). Functional adaptation and its molecular basis in vertebrate hemoglobins, neuroglobins and cytoglobins. *Respir. Physiol. Neurobiol.* **144**, 141–159.
- Weber, R. E. and Wells, Rufous. M. G.** (1989). Hemoglobin structure and function. In *Comparative Pulmonary Physiology: Current Concepts* (ed. Wood, S. C.), pp. 279–310. New York: Marcel Dekker.
- Weber, R. E., Wood, S. C. and Lomholt, J. P.** (1976). Temperature acclimation and oxygen-binding properties of blood and multiple haemoglobins of rainbow trout. *J. Exp. Biol.* **65**, 333–345.
- Weber, R. E., Campbell, K. L., Fago, A., Malte, H. and Jensen, F. B.** (2010). ATP-induced temperature independence of hemoglobin-O<sub>2</sub> affinity in heterothermic billfish. *J. Exp. Biol.* **213**, 1579–1585.
- Wegner, N. C., Sepulveda, C. A., Bull, K. B. and Graham, J. B.** (2010). Gill morphometrics in relation to gas transfer and ram ventilation in high- energy demand teleosts: Scombrids and billfishes. *J. Morphol.* **271**, 36–49.
- Wegner, N. C., Snodgrass, O. E., Dewar, H. and Hyde, J. R.** (2015). Whole-body endothermy in a mesopelagic fish, the opah, *Lampris guttatus*. *Science* **348**, 786–789.
- Wells, R. M. G. and Davie, P. S.** (1985). Oxygen binding by the blood and hematological effects of capture stress in two big gamefish: mako shark and striped marlin. *Comp. Biochem. Physiol. A Physiol.* **81**, 643–646.

- Wells, R. M. G., McIntyre, R. H., Morgan, A. K. and Davie, P. S.** (1986). Physiological stress responses in big gamefish after capture: observations on plasma chemistry and blood factors. *Comp. Biochem. Physiol. A Physiol.* **84**, 565–571.
- Wendelaar Bonga, S. E.** (1997). The stress response in fish. *Physiol. Rev.* **77**, 591–625.
- Wyman, J.** (1964). Linked functions and reciprocal effects in haemoglobin: a second look. *Adv. Protein Chem.* **19**, 223–286.
- Zijlstra, W. G. and Buursma, A.** (1997). Spectrophotometry of hemoglobin: absorption spectra of bovine oxyhemoglobin, deoxyhemoglobin, carboxyhemoglobin, and methemoglobin. *Comp. Biochem. Physiol. B Biochem. Mol. Biol.* **118**, 743–749.

Figures and Tables

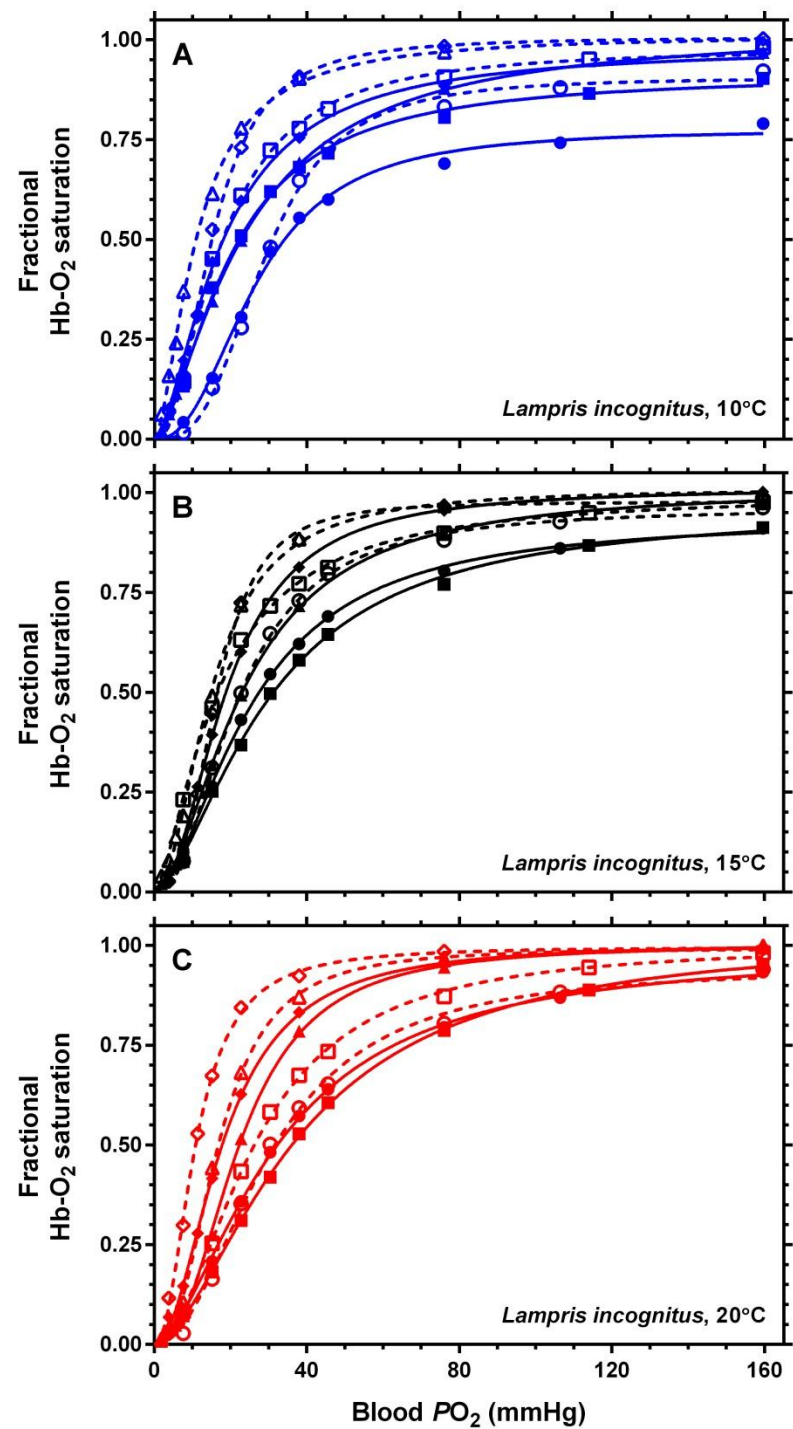

**Fig. 1. Oxygen equilibrium curves (OECs) of smalleye Pacific opah (*Lampris incognitus*) blood.** Symbols indicate measured values for 4 opah [symbol, fork length (FL)]: circles, FL = 105 cm; squares, FL = 116 cm; triangles, FL = 123 cm; diamonds, FL = 110 cm. OECs were constructed at a low CO<sub>2</sub> (PCO<sub>2</sub> = 1.9 mmHg; open symbols and dashed curves) and a high CO<sub>2</sub> (PCO<sub>2</sub> = 7.6 mmHg; closed symbols and solid curves), at 10°C (A), 15°C (B), and 20°C (C).

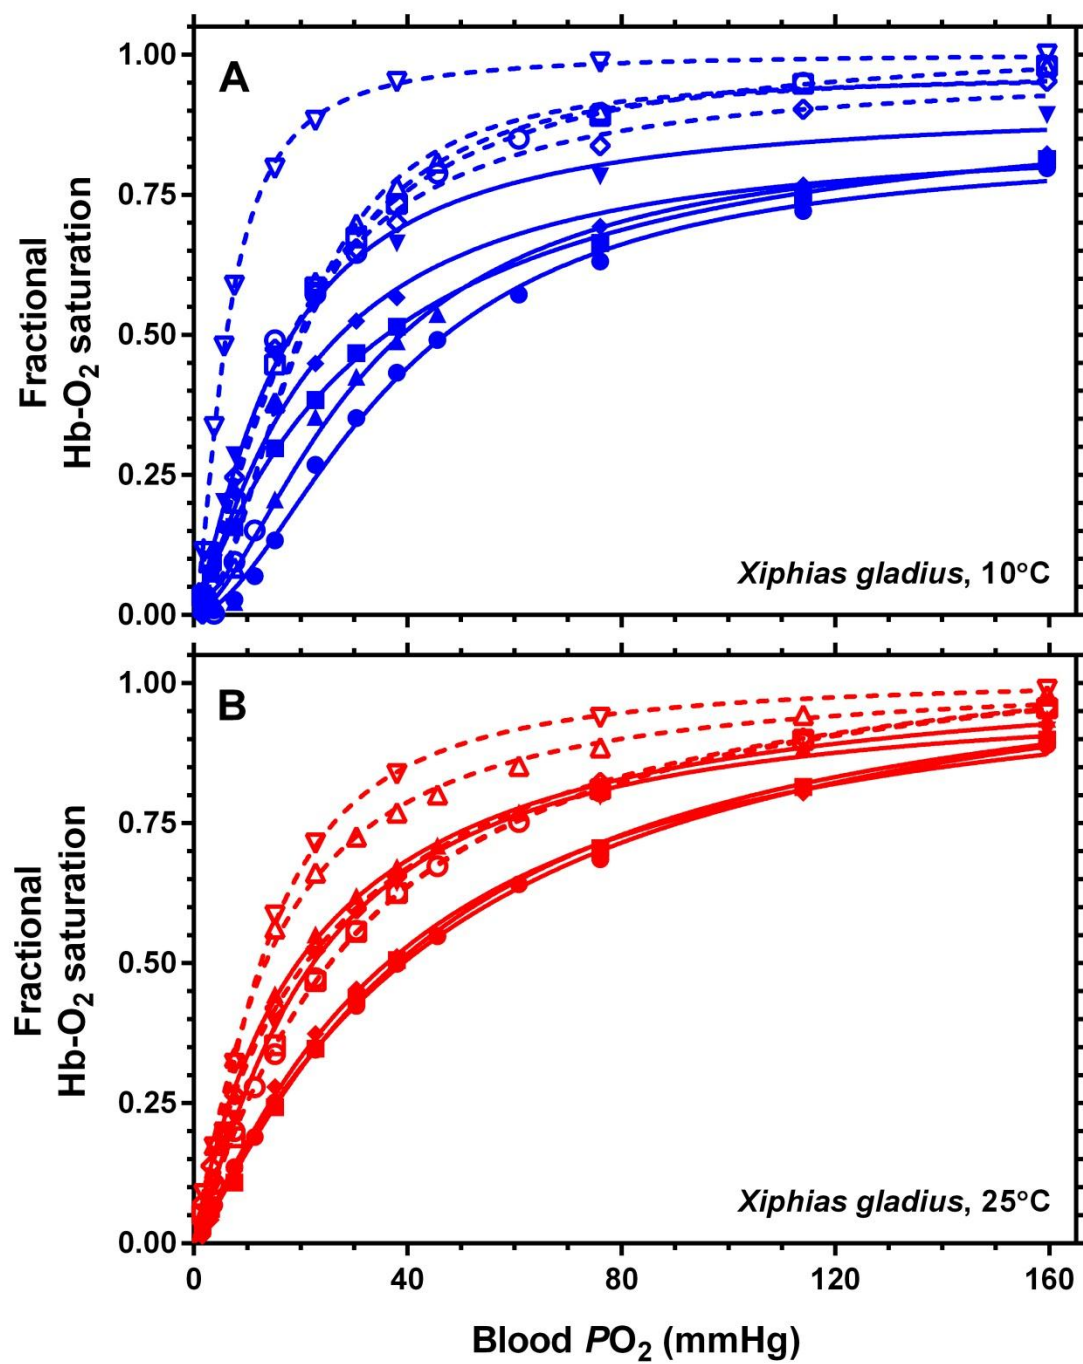

**Fig. 2. Oxygen equilibrium curves (OECs) of swordfish (*Xiphias gladius*).** Symbols indicate measured values for 5 swordfish [symbol, lower jaw fork length (FL)]: circles, 182 cm; squares, 122 cm; triangles, 150 cm; diamonds, 144 cm; down-pointing triangles, 183 cm. OECs were constructed at a low CO<sub>2</sub> (PCO<sub>2</sub> = 1.9 mmHg; open symbols and dashed curves) and a high CO<sub>2</sub> (PCO<sub>2</sub> = 7.6 mmHg; closed symbols and solid curves), at 10°C (A), and 25°C (B).



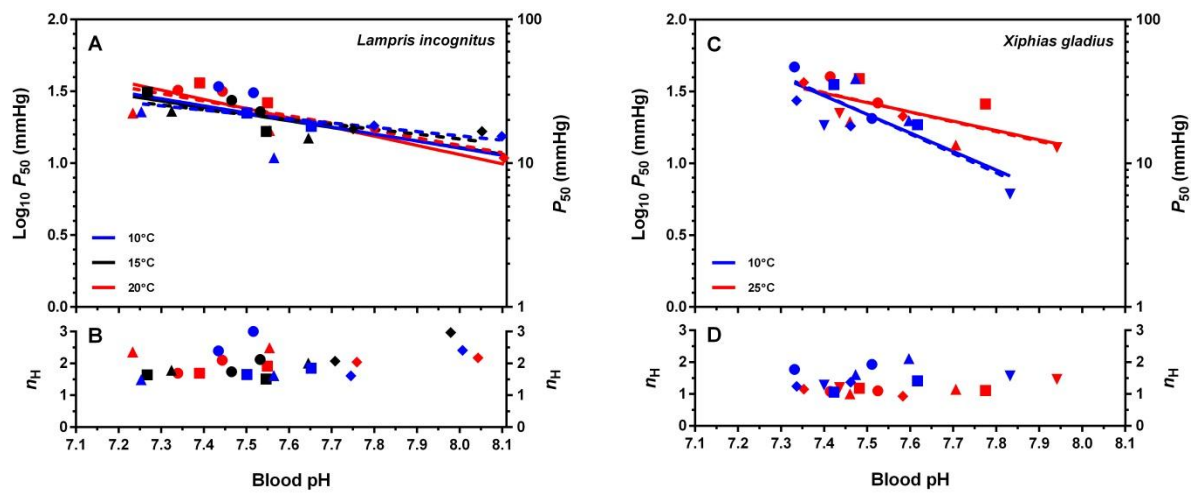

**Fig. 3. Dependence of blood-oxygen affinity ( $P_{50}$ ) and the Hill coefficient ( $n_H$ ) on whole blood pH for smalleye Pacific opah (*Lampris incognitus*) and swordfish (*Xiphias gladius*).** Opah and swordfish  $P_{50}$  (A and C) and  $n_H$  (B and D) values correspond to the OECs shown in Figs 1 and 2, with different symbols indicating different individuals (see legends of Figs 1 and 2). Opah data are at 10°C (blue), 15°C (black), and 20°C (red), and swordfish data are at 10°C (blue) and 25°C (red). Solid lines are the best fit lines from mixed models at each temperature, and the dashed lines are the best fit lines from ordinary least squares regression (presented for comparison).

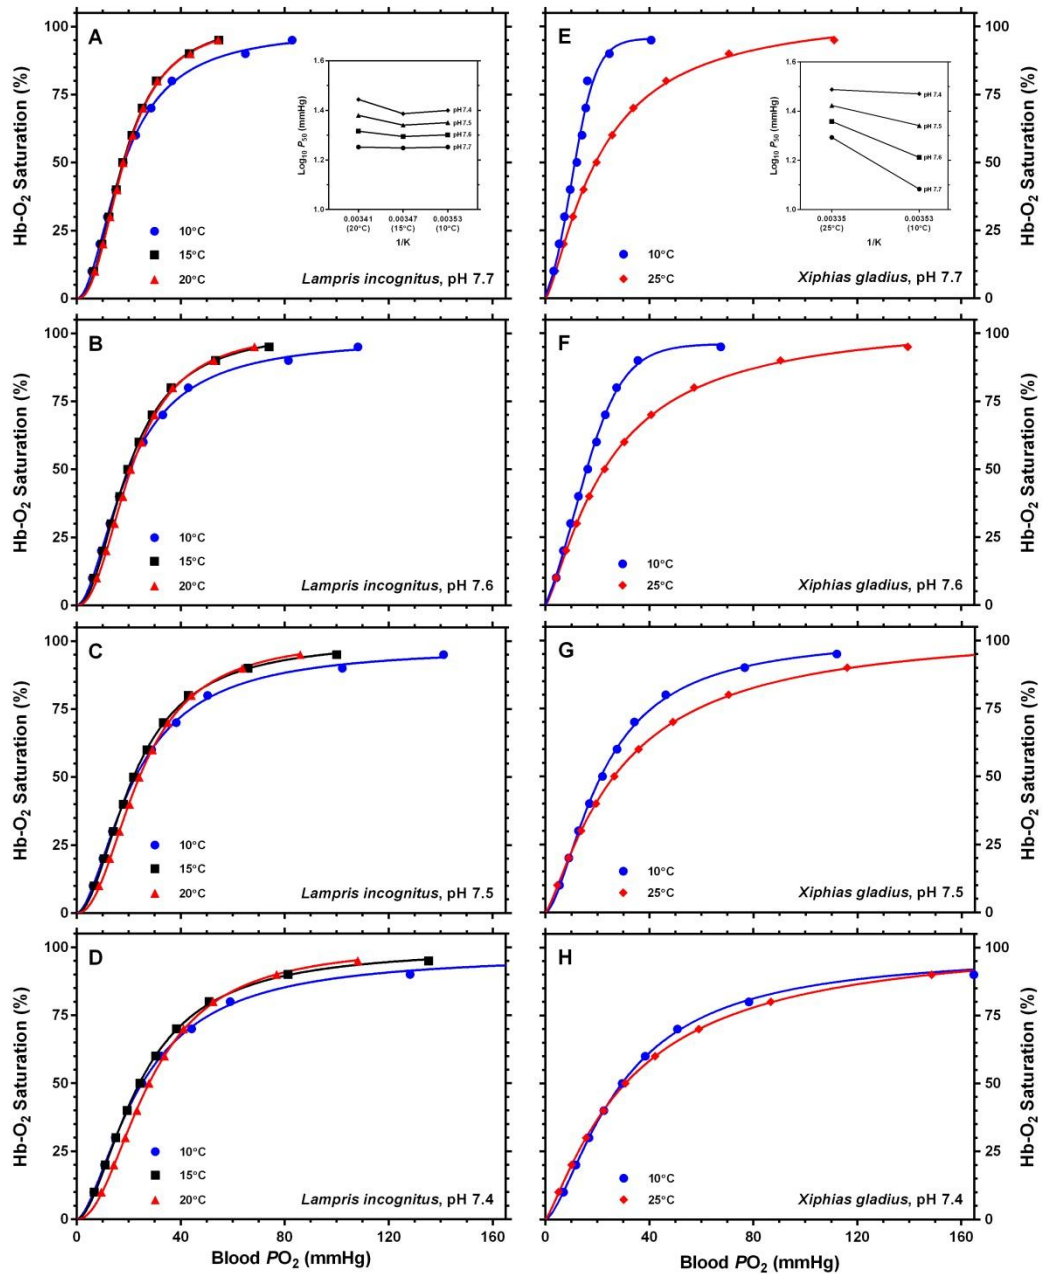

**Fig. 4. Modelled whole blood oxygen equilibrium curves (OECs) of smalleye Pacific opah (*Lampris incognitus*) and swordfish (*Xiphias gladius*) at different pH and temperatures.** OECs were constructed at standardised pH levels by interpolating blood  $PO_2$  values from linear mixed models of  $\log PO_2$  vs pH for specific Hb- $O_2$  saturation levels at each experimental

temperature. Opah OECs (A, B, C, and D) were modelled at 10°C, 15°C, and 20°C. Swordfish OECs (E, F, G, and H) were modelled at 10°C and 25°C. OECs were constructed at four pH levels: pH 7.7 (A and E), pH 7.6 (B and F), pH 7.5 (C and G), and pH 7.4 (D and H). Inset figures in panels A and E show van't Hoff plots of  $\log P_{50}$  vs  $1/K$ , where K is the blood temperature in kelvin.

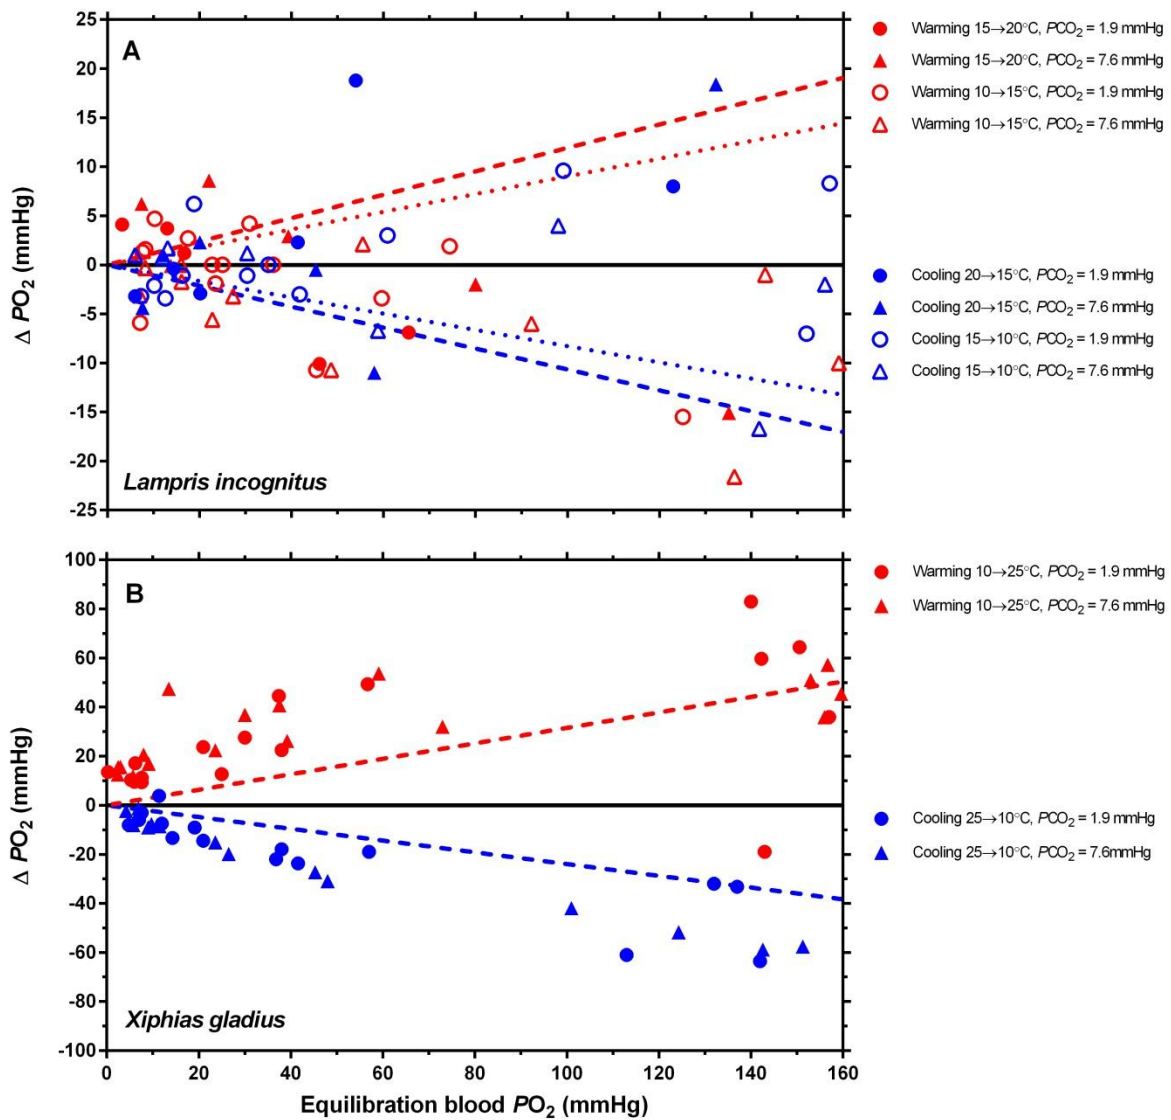

**Fig. 5. Effects of closed-system temperature changes on the measured change in blood  $PO_2$  ( $\Delta PO_2$ ) in blood of smalleye Pacific opah (*Lampris incognitus*) and swordfish (*Xiphias gladius*).** Blood from four opah (A) and five swordfish (B) was equilibrated at a range of  $O_2$  tensions, at a  $PCO_2$  of either 1.9 mmHg (circles) or 7.6 mmHg (triangles) and then warmed (red) or cooled (blue). Opah blood temperature was changed between either 10 and 15°C (open symbols) or 15 and 20°C (closed symbols), and swordfish blood was changed between 10 and 25°C. Dotted lines indicate the theoretical temperature induced  $\Delta PO_2$  expected due to changes in

solubility of blood plasma at a given equilibration  $PO_2$  (i.e., Henry's Law) with warming (red) or cooling (blue) between 10 and 15°C (dashed), and 15 and 20°C (dotted) for opah blood, and between 10 and 25°C (dashed) for swordfish blood. Oxygen solubilities for plasma at the different temperatures were taken from Boutilier et al. (1984). Note the different scales on the y-axes.

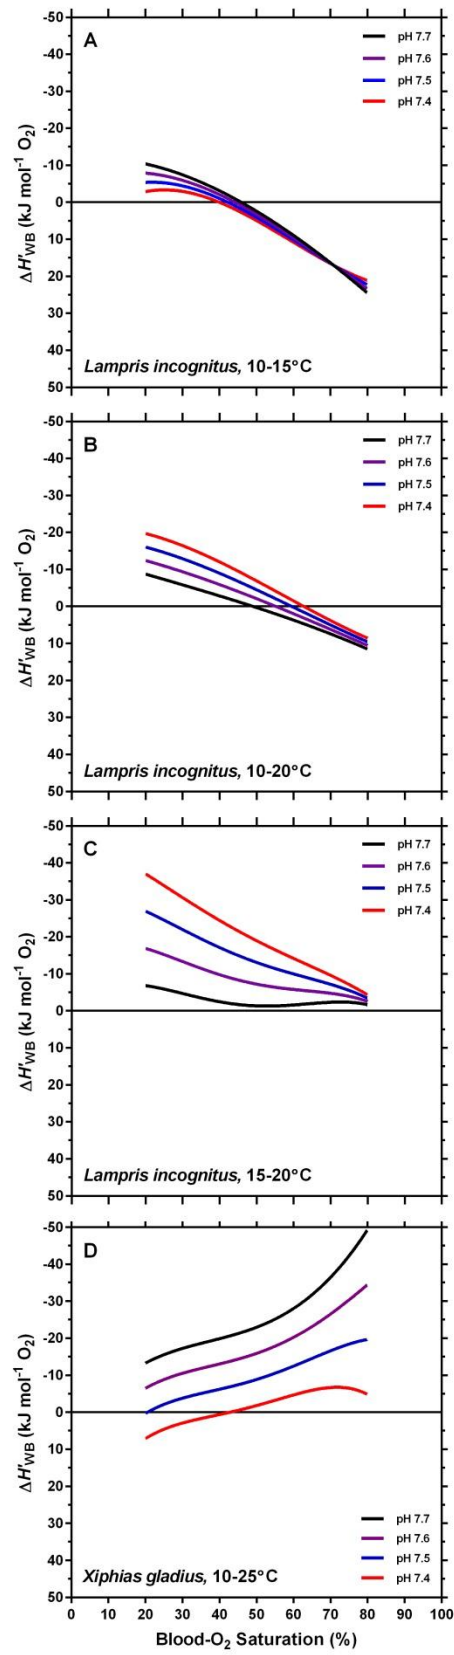

**Fig. 6. Predicted enthalpy of oxygenation ( $\Delta H'_{WB}$ ) as a function of whole blood pH and whole blood Hb-O<sub>2</sub> saturation for the smalleye Pacific opah (*Lampris incognitus*) and the swordfish (*Xiphias gladius*).  $\Delta H'_{WB}$  values were calculated with the van't Hoff isochore at constant pH between 10-15°C (A), 10-20°C (B), and 15-20°C (C) for opah blood, and between 10-25°C (D) for swordfish blood. The blood-O<sub>2</sub> tensions ( $PO_2$ ) at specific blood-O<sub>2</sub> saturation levels at a given pH and temperature are presented in Fig. 4.**



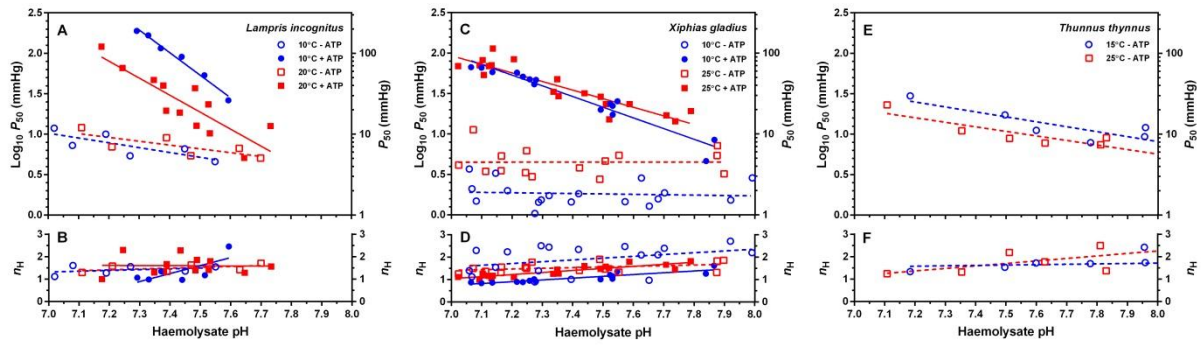

**Fig 7. Temperature and pH dependence of  $P_{50}$  and  $n_H$  values of stripped haemolysates of smalleye Pacific opah (*Lampris incognitus*), swordfish (*Xiphias gladius*), and Atlantic bluefin tuna (*Thunnus thynnus*).** Experiments were conducted in 100 mmol l<sup>-1</sup> Hepes buffer at tetrameric Hb concentrations of 0.6 mmol l<sup>-1</sup>, in the absence of ATP (open symbols) and presence of ATP (closed symbols; [ATP] = 18 mmol l<sup>-1</sup>; [ATP]/[Hb<sub>4</sub>] = 30). Low temperature data (circles) are at 10°C for opah and swordfish, and 15°C for bluefin tuna. Warm temperature data (squares) are at 20°C for opah, and 25°C for swordfish and bluefin tuna. (A, C, and E) Bohr plots of  $\log_{10}P_{50}$  and haemolysate pH. (B, D, and F) Hill coefficients ( $n_H$ ) plotted against haemolysate pH. Dashed lines (absence of ATP) and solid lines (presence of ATP) are the best fit lines from ordinary least squares regression models across the range of experimental pH values.

**Table 1. Fork length (FL), and blood variables for smalleye Pacific opah, swordfish, and Atlantic bluefin tuna.**

|                                                         | <b>Opah</b>     | <b>Swordfish</b> | <b>Bluefin Tuna</b> |
|---------------------------------------------------------|-----------------|------------------|---------------------|
| FL* (cm)                                                | 113 ± 4 (4)     | 156 ± 12 (5)     | 107, 109            |
| Haematocrit (%)                                         | 59.1 ± 2.5 (4)  | 46.3 ± 4.7 (7)   | 57.8, 53.5          |
| Haemoglobin, [Hb <sub>4</sub> ] (mmol l <sup>-1</sup> ) | 2.21 ± 0.12 (4) | 1.81 ± 0.15 (7)  | 2.53, 2.36          |
| MCHC (mmol l <sup>-1</sup> )                            | 3.74 ± 0.14 (4) | 3.96 ± 0.20 (7)  | 4.37, 4.41          |
| ATP:Hb <sub>4</sub> (mol mol <sup>-1</sup> )            | 1.32, 0.68      | 0.67 ± 0.16 (7)  | 0.40, 0.54          |
| Plasma osmolality (mOsm kg <sup>-1</sup> )              | 565.2 ± 6.4 (3) | 437.5 ± 19.9 (7) | 410, 379            |
| Plasma lactate (mmol l <sup>-1</sup> )                  | 14.7 ± 0.79 (3) | 12.0 ± 1.53 (6)  | 18.7, 18.6          |

\*Swordfish FL was measured from the lower jaw.

Values are means ± s.e.m. with samples sizes in parentheses. If values were measured in only two individuals, then the individual measurements are reported.

**Table 2. Whole blood oxygen equilibria parameters for smalleye Pacific opah and swordfish at different temperatures.**

|                                | Opah (4)             |                      |                      | Swordfish (5)         |                       |
|--------------------------------|----------------------|----------------------|----------------------|-----------------------|-----------------------|
|                                | 10°C ( <i>n</i> = 8) | 15°C ( <i>n</i> = 8) | 20°C ( <i>n</i> = 8) | 10°C ( <i>n</i> = 10) | 25°C ( <i>n</i> = 10) |
| $\log P_{50}$ (mmHg) at pH 7.7 | 1.25 ± 0.11          | 1.25 ± 0.11          | 1.25 ± 0.12          | 1.08 ± 0.14           | 1.29 ± 0.12           |
| $P_{50}$ (mmHg) at pH 7.7      | 17.9                 | 17.7                 | 17.9                 | 12.1                  | 19.6                  |
| $n_H$ at pH 7.7                | 2.03 ± 0.15          | 2.14 ± 0.15          | 2.26 ± 0.15          | 1.67 ± 0.14           | 1.20 ± 0.10           |
| Bohr coefficient               | -0.49 ± 0.28         | -0.46 ± 0.32         | -0.64 ± 0.30         | -1.29 ± 0.50          | -0.65 ± 0.60          |

$\log P_{50}$  and  $n_H$  values are reported ± bootstrap estimated s.e., and Bohr coefficients ( $\Delta \log P_{50} / \Delta \text{pH}$ ) are reported with 95% CIs. Numbers in parentheses beside each species name indicate the number of individuals sampled, and the sample sizes beside each temperature indicate the number of OECs generated for each temperature treatment (i.e., two per individual).

**Table 3. Haemolysate oxygen equilibria parameters of smalleye Pacific opah, swordfish, and Atlantic bluefin tuna at two experimental temperatures and in the absence or presence of ATP.**

|                                                             | Opah (2)     |              | Swordfish (6) |              | Bluefin tuna (2) |              |
|-------------------------------------------------------------|--------------|--------------|---------------|--------------|------------------|--------------|
|                                                             | 10°C         | 20°C         | 10°C          | 25°C         | 15°C             | 25°C         |
| <b>n (No. of OECs)</b>                                      |              |              |               |              |                  |              |
| Stripped Hb                                                 | 6            | 6            | 25            | 22           | 7                | 9            |
| Hb + ATP                                                    | 6            | 12           | 16            | 22           |                  |              |
| <b>log<math>P_{50}</math> (mmHg), pH 7.4</b>                |              |              |               |              |                  |              |
| Stripped Hb                                                 | 0.77 ± 0.15  | 0.87 ± 0.11  | 0.26 ± 0.08   | 0.65 ± 0.10  | 1.31 ± 0.11      | 1.14 ± 0.09  |
| Hb + ATP                                                    | 2.01 ± 0.06  | 1.48 ± 0.14  | 1.46 ± 0.05   | 1.54 ± 0.06  |                  |              |
| <b><math>P_{50}</math> (mmHg), pH 7.4</b>                   |              |              |               |              |                  |              |
| Stripped Hb                                                 | 5.9          | 7.3          | 1.8           | 4.5          | 20.6             | 13.7         |
| Hb + ATP                                                    | 102.4        | 30.5         | 29.0          | 34.8         |                  |              |
| <b>Bohr coefficients</b>                                    |              |              |               |              |                  |              |
| Stripped Hb                                                 | -0.60 ± 0.52 | -0.47 ± 0.70 | -0.05 ± 0.28  | 0.00 ± 0.41  | -0.71 ± 0.21     | -0.68 ± 0.32 |
| Hb + ATP                                                    | -2.78 ± 1.48 | -2.10 ± 1.65 | -1.32 ± 0.23  | -1.06 ± 0.31 |                  |              |
| <b><math>\Delta H'</math> (kJ mol<sup>-1</sup>), pH 7.4</b> |              |              |               |              |                  |              |
| Stripped Hb                                                 |              | -15          |               | -42          |                  | +29          |
| Hb + ATP                                                    |              | +84          |               | -9           |                  |              |

log $P_{50}$  values ± bootstrap s.e. were predicted at pH 7.4, and Bohr coefficients ( $\Delta \log P_{50} / \Delta \text{pH}$ ) are reported ± 95% CIs.  $\Delta H'$  values include the heat O<sub>2</sub> solubilization (-14 kJ mol<sup>-1</sup> at 15°C; Olofsson et al., 1984). Numbers in parentheses beside each species name indicate the number of individuals sampled.

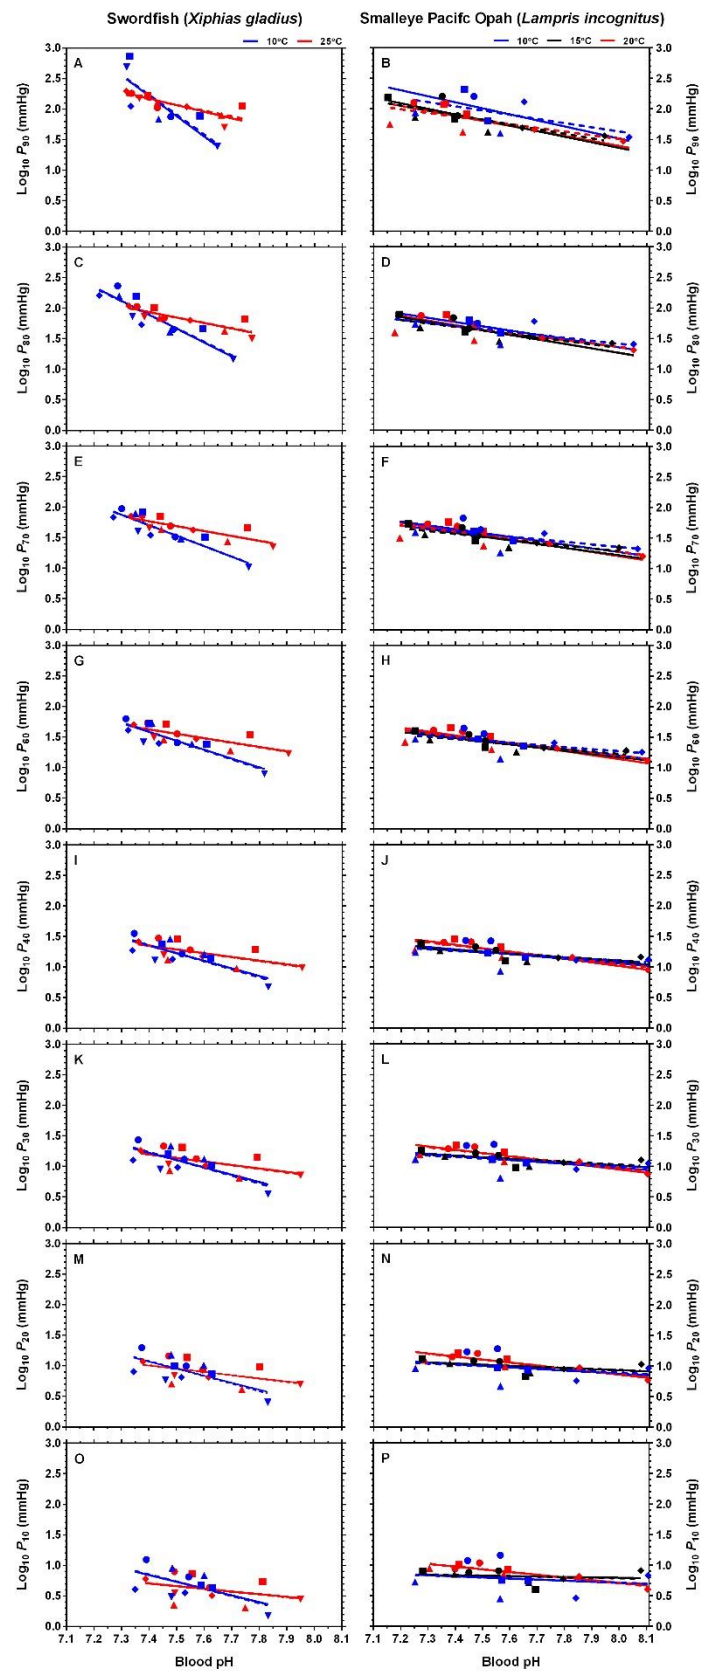

**Fig. S1. Dependence of blood PO<sub>2</sub> on whole blood pH at different temperatures for swordfish (*Xiphias gladius*) and smalleye Pacific opah (*Lampris incognitus*).** PO<sub>2</sub> values at different Hb-O<sub>2</sub> saturations (i.e., P<sub>10</sub>, P<sub>20</sub>, P<sub>30</sub>, P<sub>40</sub>, P<sub>60</sub>, P<sub>70</sub>, P<sub>80</sub>, and P<sub>90</sub>; P<sub>50</sub> data are shown in Fig. 3) correspond to the oxygen equilibrium curves (OECs) shown in Figs 1 and 2. Swordfish data (A, C, E, G, I, K, M, and O) are at 10°C (blue) and 25°C (red), and opah data are at 10°C (blue), 15°C (black), and 20°C (red). Solid lines are the best fit lines from mixed models at each temperature (see Materials and Methods), and the dashed lines are the best fit lines from ordinary least squares regression (presented for comparison). The mixed model fits were used to construct the modelled OECs shown in Fig. 4. Different symbols are for individual fish (4 opah and 5 swordfish) as follows. Opah [symbol, fork length (FL)]: circles, 105 cm; squares, 116 cm; triangles, 123 cm; diamonds, 110 cm. Swordfish [symbol, lower jaw fork length (FL)]: circles, 182 cm; squares, 122 cm; triangles, 150 cm; diamonds, 144 cm; down-pointing triangles, 183 cm.

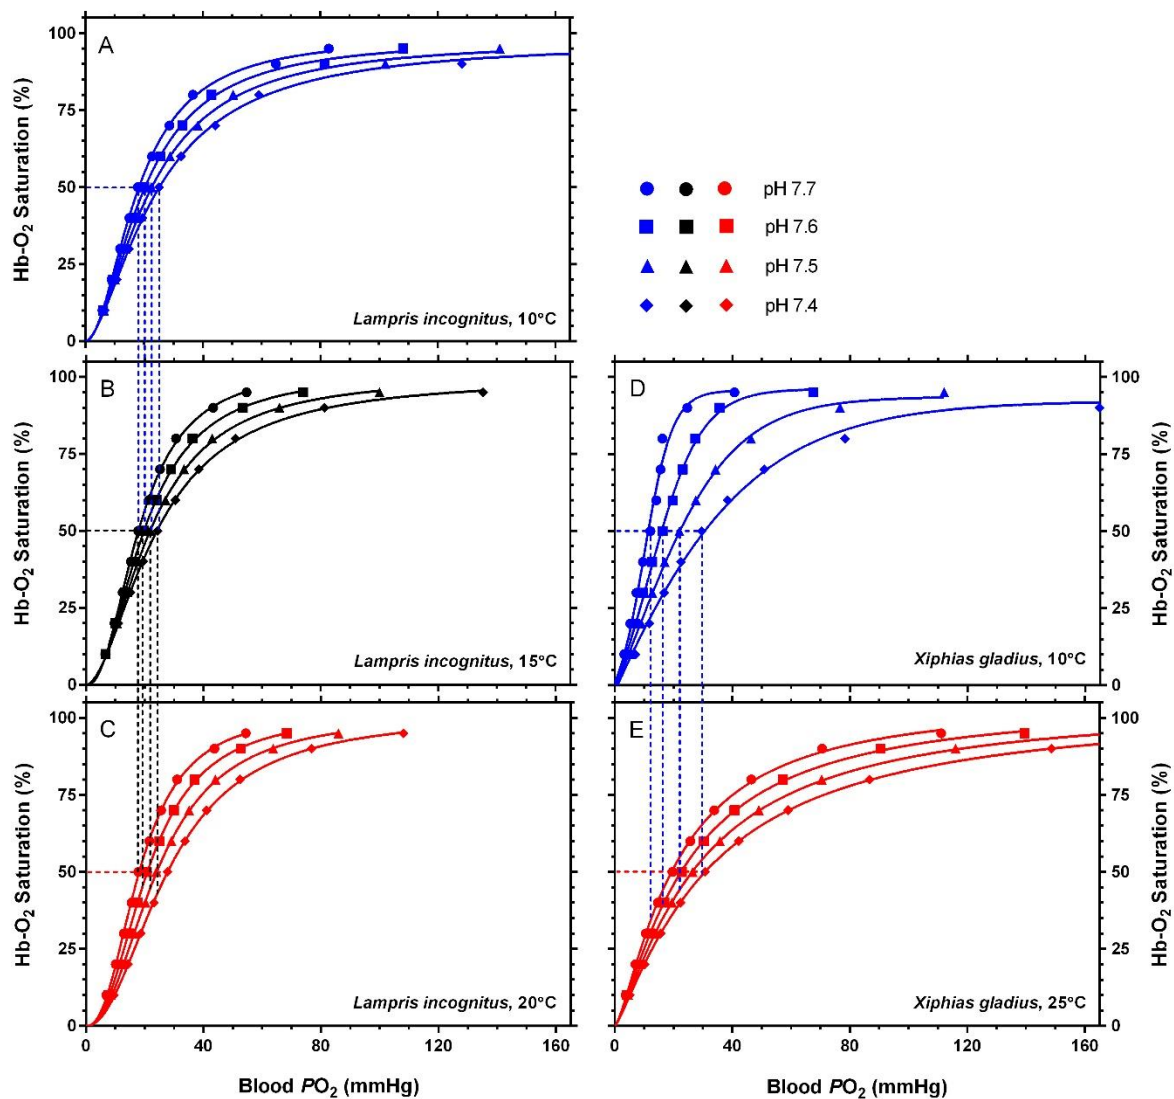

**Fig. S2. Modelled whole blood oxygen equilibrium curves (OECs) of smalleye Pacific opah (*Lampris incognitus*) and swordfish (*Xiphias gladius*) at different temperatures and pH.** OECs were constructed at standardised pH levels by interpolating blood  $PO_2$  values from linear mixed models of  $\log PO_2$  vs pH for specific Hb-O<sub>2</sub> saturation levels at each experimental temperature (see Materials and Methods). OECs were constructed at four pH levels: pH 7.7 (circles), pH 7.6 (squares), pH 7.5 (triangles), and pH 7.4 (diamonds). Opah OECs (A, B, and C) were modelled at 10°C (blue), 15°C (black), and 20°C (red). Swordfish OECs (D and E) were modelled at 10°C (blue) and 25°C (red). Horizontal dashed lines indicate 50% Hb-O<sub>2</sub> saturation, and vertical dashed lines illustrate the effect of temperature on Hb-O<sub>2</sub> saturation.
